1

2 **Erythropoietin production by the kidney and the liver in response to severe**

3 **hypoxia evaluated by Western blotting with deglycosylation**

4

5 Yukiko Yasuoka, <sup>1</sup>, Takashi Fukuyama, <sup>2</sup>, Yuichiro Izumi, <sup>3</sup>, Yushi Nakayama,<sup>3</sup>, Hideki Inoue,

6 <sup>3</sup>, Kengo Yanagita, <sup>4</sup>, Tomomi Oshima, <sup>1</sup>, Taiga Yamazaki, <sup>2</sup>, Takayuki Uematsu, <sup>2</sup>, Noritada

7 Kobayashi, <sup>2</sup>, Yoshitaka Shimada, <sup>5</sup>, Yasushi Nagaba, <sup>5</sup>, Masashi Mukoyama, <sup>3</sup>, Tetsuro

8 Yamashita, <sup>6</sup>, Yuichi Sato, <sup>4</sup>, Katsumasa Kawahara, <sup>1</sup>, Hiroshi Nonoguchi, <sup>5,\*</sup>

9

10 <sup>1</sup>Department of Physiology, Kitasato University School of Medicine, 1-15-1 Kitasato, Minami-  
11 ku, Sagamihara, Kanagawa 252-0374, Japan

12 <sup>2</sup>Division of Biomedical Research, Kitasato University Medical Center, 6-100 Arai, Kitamoto,  
13 Saitama 364-8501, Japan

14 <sup>3</sup>Department of Nephrology, Kumamoto University Graduate School of Medicine, 1-1-1 Honjo,  
15 Chuo-ku, Kumamoto, Kumamoto 860-8556, Japan

16 <sup>4</sup>Department of Molecular Diagnostics, Kitasato University School of Allied Health Sciences, 1-  
17 15-1 Kitasato, Minami-ku, Sagamihara, Kanagawa 252-0373, Japan

18 <sup>5</sup>Division of Internal Medicine, Kitasato University Medical Center, 6-100 Arai, Kitamoto,

19 Saitama 364-8501, Japan

20 <sup>6</sup>Department of Biological Chemistry and Food Sciences, Faculty of Agriculture, Iwate

21 University, 3-18-8 Ueda, Morioka, Iwate 020-8550, Japan

22

23 **\*Corresponding author**

24 Hiroshi Nonoguchi, M.D., Ph.D.

25 Division of Internal Medicine, Kitasato University Medical Center, 6 -100 Arai, Kitamoto,

26 Saitama 364-8501, Japan

27 E-mail: [nono@insti.kitasato-u.ac.jp](mailto:nono@insti.kitasato-u.ac.jp)

28

29

30 **Abstract**

31 The detection of erythropoietin (Epo) protein by Western blotting has required pre-purification  
32 of the sample. We developed a new Western blot method to detect plasma and urinary Epo using  
33 deglycosylation. Epo in urine and tissue and erythropoiesis-stimulating agents (ESAs) in urine  
34 were directly detected by our Western blotting. Plasma Epo and ESAs were detected by our  
35 Western blotting after deglycosylation. The broad bands of Epo and ESAs were shifted to 22  
36 kDa by deglycosylation except PEG-bound epoetin  $\beta$  pegol. The 22 kDa band from anemic  
37 patient urine was confirmed by Liquid Chromatography/Mass Spectrometry (LC/MS) to contain  
38 human Epo.

39 Sever hypoxia (7% O<sub>2</sub>, 4 hr) caused a 400-fold increase in deglycosylated Epo expression in rat  
40 kidneys, which is consistent with the increases in both Epo gene expression and plasma Epo  
41 concentration. Immunohistochemistry showed Epo expression in nephrons but not in interstitial  
42 cells under control conditions, and hypoxia increased Epo expression in interstitial cells but not  
43 in tubules.

44 These data show that intrinsic Epo and all ESAs can be detected by Western blot either directly  
45 in urine or after deglycosylation in blood, and that the kidney is the main and sole site of Epo  
46 production in control and severe hypoxia. Our method will completely change Epo doping and  
47 detection.

48

## 49 **Introduction**

50           Anemia is one of the most common diseases in humans [1]. Severe anemia and hypoxia  
51 stimulate the production of erythropoietin (Epo) by the kidney [2-8]. The increase in Epo  
52 production is measured by the increases in serum and urine Epo concentrations and in Epo  
53 mRNA expression in the kidney [4-11]. Serum or urine Epo concentrations have been measured  
54 by radio immunoassay (RIA) or enzyme-linked immunosorbent assay (ELISA) using antibodies  
55 against Epo [4, 9-12]. However, Epo protein expression in the kidney or liver has not been  
56 measured accurately, since Western blotting of Epo has not been possible. Serum/urine Epo  
57 concentrations, and Epo mRNA and HIF1 $\alpha$ /2 $\alpha$  expressions in the kidney and liver have been  
58 used as a substitute for Epo protein expression in the kidney and liver [4-13]. However, the  
59 increase of kidney-produced Epo has not been shown to increase to the same degree. This  
60 suggest the possibility that Epo production by the liver may have some role for the increase of  
61 Epo production in response to severe hypoxia [2, 3, 14].

62           The discovery of Epo led to the invention of erythropoiesis stimulating agents (ESAs) to  
63 treat anemic patients with chronic kidney disease (CKD) [15-17]. ESAs have also been illegally  
64 used by athletes to improve physical activity, leading to tests for doping [18]. The World Anti-  
65 Doping Agency (WADA) Technical Documents for Epo (TD2014EPO in TD2019INDEX)

66 recommended the use of isoelectrical focusing (IEF) and/or SAR-PAGE after enrichment for  
67 Epo through ultrafiltration, selective protein precipitation or immunopurification to detect Epo in  
68 the urine or serum/plasma [19]. ELISA or Liquid Chromatography/Mass Spectrometry (LC/MS)  
69 after the pre-purification of urine are also useful. These recommendations clearly show that the  
70 detection of Epo by Western blotting is difficult.

71 We have reported a new method of Western blot analysis succeeding in the detection of  
72 kidney-produced Epo [20]. We have reported that Epo is produced by the cortical nephrons in  
73 control condition using in situ hybridization, immunohistochemistry and real time PCR with  
74 microdissected nephron segments. We also showed that Epo production by the intercalated  
75 cells of the collecting ducts is regulated by renin-angiotensin-aldosterone system [20]. We  
76 modified our method to detect plasma and urinary Epo. We report the new Western blot method  
77 for the detection of Epo protein in the plasma or urine. Using our new method, we investigated  
78 the role of kidney and liver for Epo production in response to severe hypoxia.

79

## 80 **Methods**

81

### 82 *Materials and animals*

83 Male Sprague Dawley rats (Japan SLC, Hamamatsu, Japan) were used in our study. In

84 the severe hypoxia experiments, rats were exposed to 7% O<sub>2</sub> and 93% N<sub>2</sub> for 1-4 hr, which is  
85 known to stimulate rapid Epo production and is closer to the conditions at the summit of Mount  
86 Everest [9, 21]. For the detection of ESAs in plasma and urine, large doses of ESAs were  
87 administered to some rats through the vena cava, and plasma and urine were collected after 30  
88 min from the aorta and bladder, respectively. Animal experiments were conducted in accordance  
89 with the Kitasato University Guide for the Care and Use of Laboratory Animals and were  
90 approved by the Institutional Animal Care and Use Committee (Approval No. 2018-030, 25-2).  
91 Blood and urine were collected from patients with CKD who received ESAs and from patients  
92 with severe anaemia. Urine was concentrated using a Vivaspin (GE Healthcare Bio-Science AB,  
93 Sweden). Our protocols were checked and approved by the above committee and the Ethics  
94 Committee at Kitasato University Medical Center (25-2, 2018032, 2019029). Informed consent  
95 was obtained from all patients.

96

#### 97 ***Real-time PCR in control and hypoxic rats***

98 The renal cortex and liver were collected from control and hypoxic rats. RNA was  
99 extracted using the RNeasy Mini Kit (Qiagen, 74106) and Qiacube. cDNA was synthesized  
100 using a Takara PrimeScript™ II 1st strand cDNA Synthesis Kit (Takara, 6210). Real-time PCR  
101 was performed using probes from Applied Biosystems and Premix Ex Taq (Takara, RR39LR).

102 Probes were obtained from Applied Biosystems (Epo, Rn01481376\_m1; HIF2 $\alpha$ ,  
103 Rn00576515\_m1; HIF1 $\alpha$ , Rn01472831\_m1; PHD2, Rn00710295\_m1, Thermo Fisher Scientific,  
104 USA).  $\beta$ -actin (Rn00667869\_m1) was used as an internal standard.

105

### 106 ***Western blot analysis***

107 Western blot analysis was performed as described previously [20, 22]. Protein was  
108 collected from the renal cortex and liver using CelLytic MT (Sigma-Aldrich, C-3228) plus  
109 protease inhibitor (Roche, 05892970001). Urine samples were obtained from rats injected large  
110 doses of ESAs 30 min before the collection and from anemic patients. Plasma was obtained from  
111 rats injected large amount of ESAs and from patients with iron deficiency anaemia or CKD. An  
112 anemic patient was treated by iron supplementation and blood was collected at severe and mild  
113 anemia and after complete recovery. Blood was also collected form CKD patients who were  
114 treated by the injection of epoetin  $\beta$  pegol and control subject. Informed consent was obtained  
115 from all patients. Urine samples were concentrated by Vivaspin (GE Healthcare Bio-Science  
116 AB) and used for western blot. Plasma samples were used directly or after deglycosylation as  
117 described below. After SDS-PAGE, proteins were transferred to a PVDF membrane  
118 (Immobilon-P, Merck Millipore, IPVH00010) with 160 mA for 90 min. The membrane was  
119 blocked with 5% skim milk (Morinaga, Japan) for 60 min and incubated with the antibody

120 against Epo (Santa Cruz, sc-5290, 1:500-2,000) for 60 min at room temperature. After washing,  
121 the membrane was incubated with a secondary antibody (the goat anti-mouse IgG (H+L)  
122 (Jackson ImmunoResearch Laboratories, 115-035-166, 1:5,000) for 60 min. Bands were  
123 visualized by the ECL Select Western Blotting Detection System (GE Healthcare Bio-Science  
124 AB, RPN2235) and LAS 4000 (Fujifilm). The band intensity was normalized against that of  $\beta$ -  
125 actin (MBL, M177-3), which was measured after stripping and reprobing the membrane  
126 (stripping solution, Wako, RR39LR). In some experiments, another antibody against Epo (clone  
127 AE7A5, MAB2871, R & D Systems) was used to compare the specificity of the antibody.

128

### 129 ***Deglycosylation study***

130 Since the Epo protein is a glycosylated protein, deglycosylation was performed. N-  
131 glycosidase F (PNGase, Takara, 4450) was used as previously reported [22]. In brief, a mixture  
132 of 7.5  $\mu$ l of plasma, 2.5  $\mu$ l of water, and 1  $\mu$ l of 10% SDS was boiled for 3 min. Then, 11  $\mu$ l of 2x  
133 stabilizing buffer was added, and 2  $\mu$ l of PBS or PNGase was added. The samples were  
134 incubated in a water bath at 37°C for 15-20 hr. After incubation, the samples were spun down,  
135 and the supernatant was collected. For urine analysis, 7.5  $\mu$ l – 30 ml of urine was used either  
136 directly or after concentration by Vivaspin. To 10  $\mu$ l of concentrated urine, 1  $\mu$ l of 10% SDS was  
137 added and boiled for 3min. The subsequent steps were the same as those performed for plasma.



138 In the kidney and liver samples, 10  $\mu$ l samples were treated in the same manner as urine. The 2x  
139 stabilizing buffer contained 62.5 mM Tris-HCl (pH 8.6), 24 mM EDTA, 2% NP-40 and 4% 2-  
140 mercaptoethanol.

141

#### 142 ***Plasma Epo concentration measurements***

143 Plasma and urine were collected from control and hypoxic rats. Plasma, serum and urine  
144 were also collected from patients with renal anaemia treated with ESAs or from patients with  
145 iron-deficient anaemia. Plasma, serum and urine Epo concentrations were measured by CLEIA  
146 (SRL, Tokyo, Japan, using Access Epo by Beckman Coulter, Brea, USA).

147

#### 148 ***Immunohistochemistry of Epo production sites***

149 Immunohistochemistry (IHC) of Epo expression was performed in control and severe  
150 hypoxic rats as previously reported [20, 23, 24]. A polyclonal antibody against the same  
151 sequences as sc-5290 was used, namely, sc-7956. Images were obtained using an optical  
152 microscope (Axio Imager. M2, Carl Zeiss, Oberkochen, Germany) with a digital camera  
153 (AxioCam 506, Carl Zeiss). Captured images were analysed using an image analysis system  
154 (ZEN 2, Carl Zeiss).

155

156 ***LC/MS analysis of band from western blot***

157           The 22 kDa band of the western blot was excised and subjected to LC/MS as previously  
158 reported [25]. Negative staining was used to detect deglycosylated recombinant Epo. The  
159 negatively stained protein bands were excised from the SDS-PAGE gel, and in-gel tryptic  
160 digestion was carried out using ProteaseMAX reagent (Promega, WI, USA) according to the  
161 manufacturer's protocol. The peptides were separated by L-column2 ODS (3  $\mu$ m, 0.1 x 150 mm,  
162 CERI, Tokyo, Japan) at a flow rate of 500 nl/min using a linear gradient of acetonitrile (5% to  
163 45%). Nano-LC-MS/MS analyses were performed with an LTQ-Orbitrap XL mass spectrometer  
164 (Thermo Fisher Scientific, MA, USA) as previously described [25].

165 ***Statistical analyses***

166 Statistical analyses were performed using Excel Statics (BellCurve, Tokyo, Japan). Statistical  
167 significance was analysed using ANOVA and multiple comparison with Dunnett test, or non-  
168 parametric analysis by the Kruskal-Wallis test and multiple comparisons by the Shirley-Williams  
169 test.  $P < 0.05$  was considered statistically significant.

170

171 **Results**

172

173 ***Detection of Epo protein***

174 We have reported that our western blot recognized hypoxic rat kidney Epo protein and  
175 the deglycosylated protein at 34-43 and 22 kDa, respectively. The specificity of sc-5290 was  
176 better than that of AE7A5 (Fig. 1A, B). ESAs were also detected by Western blot, and  
177 deglycosylation caused a shift of the bands to 22 kDa, except for that of epoetin  $\beta$  pegol (Fig.  
178 2A1, A2). The deglycosylated band at 22 kDa showed a 10-100 times lower limit of detection  
179 than the non-deglycosylated band at 34-43 kDa (Fig. 2B1, 2B2).

180

181 ***Detection of Epo protein and ESAs in urine***

182           The direct analysis (green line) and incubation with deglycosylation buffer (blue line) of  
183   anemic patient's urine both volume-dependently showed an Epo protein band at 36-40 kDa.  
184   Deglycosylation (red line) shifted the bands to 22 kDa (Fig. 2C). Epoetin  $\alpha$  (lane 1) and  
185   darbepoetin (lane 2) were detected by the direct application of rat urine after bolus injection.  
186   Epoetin  $\beta$  pegol (lane 3) was not detected, probably due to its limited excretion into the urine  
187   (Fig. 2D).

188

### 189   ***Detection of Epo protein and ESAs in plasma***

190           The direct analysis of plasma from control and hypoxic rats by Western blotting showed  
191   no band (Fig. 3A, green line). Incubation of the plasma with deglycosylation buffer showed  
192   bands at 34-43 kDa in 4-hr hypoxic rats but not in control rats (Fig. 3A, blue line).  
193   Deglycosylation shifted the broad band at 34-43 kDa to 22 kDa (Fig. 3A, red line). Next, direct  
194   analysis of plasma from anemic patient also showed no band (Fig. 3B, green line). Incubation of  
195   the plasma with deglycosylation buffer showed a broad band at 36-40 kDa only in the case of  
196   severe anemia (Fig. 3B, lane 1, blue line). The partial recovery of anemia caused a faint band at  
197   36-40 kDa, and complete recovery revealed no broad band at approximately 36-40 kDa.  
198   Deglycosylation caused an intense band at 22 kDa in anemia, and partial recovery of anemia  
199   caused a very faint band at 22 kDa (Fig. 3B, red line). No band was observed at 22 kDa after

200 complete recovery.

201           The detection of ESAs in plasma was tested in rats after the intravenous injection of large  
202 doses of ESAs. The plasma Epo concentration was more than 100 times higher than under severe  
203 hypoxia. In this condition, epoetin  $\alpha$  and epoetin  $\beta$  pegol were detected by the direct analysis of  
204 plasma (Fig. 3C, green line). The band of darbepoetin overlapped with the non-specific band,  
205 which was removed by the incubation of plasma with deglycosylation buffer (Fig. 3C, blue line).  
206 The bands of epoetin  $\alpha$  and darbepoetin were shifted to 22 kDa by deglycosylation (Fig. 3C, red  
207 line). The band of epoetin  $\beta$  pegol shifted from 95-120 to 80-95 kDa. In contrast, no band  
208 representing epoetin  $\beta$  pegol was detected by the direct analysis of plasma from anemic CKD  
209 patients (Fig. 3D, green line). The incubation of plasma with deglycosylation buffer induced the  
210 appearance of a band at 95-120 kDa (Fig. 3D, lane 1 in blue line), which was shifted to 80-95  
211 kDa by deglycosylation (Fig. 3D, lane 1 in red line).

212

### 213 ***Detection of Epo protein by LC/MS***

214           To confirm that the band at 22 kDa is Epo protein, the 22 kDa band of recombinant  
215 human Epo and anemic patient's urine were excised and analysed by LC/MS (Fig. 4A, B).  
216 Seven, and three peptide sequences of human Epo protein (sequence coverage 20% and 12%)  
217 were identified in the sample of recombinant human Epo and anemic patient, respectively

218 (Table. 1). Recombinant rat Epo was also identified by LC/MS (Table. 1).

219

### 220 *Epo protein expression in hypoxia*

221 Epo mRNA and protein expression in the kidney and liver in hypoxia were examined in

222 rats. HIF1 $\alpha$ , HIF2 $\alpha$  and Epo mRNA expression in the kidney reached a maximum at 2 hr after

223 hypoxia, and PHD2 mRNA expression in the kidney reached its maximum at 4 hr (Fig. 5A-D).

224 Epo mRNA showed a 200-fold increase in the kidney with no changes in the liver. (Fig. 5A).

225 The plasma Epo concentration showed a 600-fold increase at 4 hr compared with zero time (Fig.

226 5E). Epo protein expression in the kidney reached its maximum at 4 hr, while the changes in Epo

227 protein expression in the liver were small (Fig. 6A, B). Usual Western blot showed an

228 approximately 10-fold increase in Epo protein expressions in the kidney, respectively (Fig. 6A,

229 B). Incubation of the kidney samples with deglycosylation buffer without PNGase made the

230 bands clear and the increase of Epo protein expression reached 20-fold increase (Fig. 6C, D). In

231 contrast, deglycosylated Epo protein expression showed an approximately 400-fold increase

232 (Fig. 6C, F), which is very close to the changes in plasma Epo concentration. A very faint band

233 of deglycosylated Epo was observed in the hypoxic liver (Fig. 6E, F).

234

### 235 *Immunohistochemical Epo protein expression*

236 Immunohistochemistry showed that renal proximal and distal tubules in the cortex were  
237 weakly stained under basal conditions (proximal tubules < thick ascending limbs, distal  
238 convoluted tubules) (Fig. 7A, C). Severe hypoxia caused increased Epo staining of the interstitial  
239 cells around proximal tubules in the deep cortical area but decreased staining in tubular cells, as  
240 in our previous report using in situ hybridization (Fig. 7B, D).

241

## 242 **Discussion**

243 We detected Epo protein and ESAs by the combination of usual Western blotting and  
244 LS/MS for the first time. Using a new method of Western blotting, we succeeded in the detection  
245 of urinary Epo and ESAs. However, intrinsic Epo and ESAs in plasma could not be detected  
246 even by our Western blot. The incubation of plasma in deglycosylation buffer resulted in the  
247 appearance of bands at 34-43 kDa, and deglycosylation caused a shift of those bands to 22 kDa,  
248 except for that of epoetin  $\beta$  pegol (CERA). LC/MS analysis of the 22 kDa band from anemic  
249 patient's urine revealed human Epo. The sensitivity of our Western blotting is higher than that of  
250 LC/MS.

251 One of the findings of our new method is that detection limit of Epo protein is increased  
252 by deglycosylation. Detection limit of glycosylated and deglycosylated recombinant human Epo  
253 was 370 and 37 pg, respectively (Fig 2B1). The detection limit of deglycosylated recombinant rat

254 Epo was 3.7 pg (Fig 2B2). Therefore, the deglycosylation increased the detection limit of Epo by  
255 10-100 times. Therefore, accurate quantitative estimates of Epo can be obtained by measuring  
256 deglycosylated Epo. Although Epo is detected directly in the urine, the estimation of  
257 deglycosylated Epo in the urine would be more accurate.

258 Our new method will change the tests for Epo doping. Currently, Epo doping is detected  
259 by IEF and/or SAR-PAGE or LC/MS after pre-purification of the samples [18, 19]. Our method  
260 does not require any pre-purification of the samples. Concentrated urine can be used directly for  
261 Western blotting. Blood samples should be deglycosylated to reduce non-specific bands.  
262 Intrinsic Epo and ESAs are distinguished simply by band size. To completely confirm the  
263 presence of ESAs, cut gels should be checked by LC/MS. More than 1-2 ng of Epo was required  
264 to detect Epo by LC/MS, while the detection limit of Epo by our Western blotting is 3.7-37 pg.  
265 Since plasma or serum contains a lot of proteins, concentrated plasma becomes very high  
266 osmolality and is difficult to use for Western blotting. In contrast, urine has usually no protein  
267 except patients with CKD, concentrated urine can be used for Western blotting.

268 Our new method allowed conclusions regarding unsolved questions about the sites of Epo  
269 production in response to severe hypoxia/anemia. Since the increase in Epo production in the  
270 kidney was not high enough compared to the changes in plasma Epo concentration and gene  
271 expression in the kidney, liver participation has been suggested [2-5, 14]. The difficulty of Epo



272 protein detection by Western blot was the main reason. We showed that deglycylation increased  
273 the sensitivity of Epo detection by 10-100 times. Deglycosylated Epo expression showed a 400-  
274 fold increase, which is very close to the change of Epo concentration in plasma. Deglycosylated  
275 Epo expression in the hypoxic liver was very low. The increases of HIF1 $\alpha$  and HIF2 $\alpha$  mRNA  
276 expression as well as Epo mRNA were observed in the hypoxic kidney but not in the hypoxic  
277 liver. The increase of PHD2 mRNA expression and a large decrease of Epo mRNA expression  
278 were observed in the kidney 4 hr after hypoxia. HIF2 $\alpha$  has a key role for Epo production and  
279 PHD2 has a key role for the degradation of Epo [26-28]. These data clearly show that the kidney  
280 is the main and sole site of Epo production in response to severe hypoxia. Although plasma Epo  
281 is very low in normal rats and humans, control rat kidneys showed deglycosylated Epo  
282 production, and immunohistochemistry showed Epo production in the cortical nephrons. Mujais  
283 and colleagues reported Epo mRNA expression in renal tubules using microdissected nephron  
284 segments in cobalt chloride-injected rats [29]. We have previously shown that fludrocortisone  
285 stimulated Epo production by the intercalated cells of the collecting ducts [20]. Our  
286 immunohistochemistry also showed that kidney interstitial cells respond to severe hypoxia by  
287 producing Epo. Yamamoto and colleagues showed that the site of Epo production by severe  
288 anemia is the interstitial cells using EPO promoter-driven GFP expression [8, 13]. Since 27  
289 kDa GFP goes into nucleus, they may have overestimated the role of Epo production by

290 interstitial cells in severe anemia. Since the cytoplasm of interstitial cells is very pale, Epo  
291 production by interstitial cells under hypoxia may not be as strong as expected. These data show  
292 that kidney nephrons produce Epo under control conditions and that kidney interstitial cells  
293 produce Epo in response to severe hypoxia or anaemia.

294 In conclusion, our data showed that Epo protein can be detected in urine and tissue  
295 samples by direct Western blot analysis and in blood after deglycosylation. Our data also showed  
296 that the kidneys have dual Epo production systems, low production by the nephron under normal  
297 conditions and hypoxia or anemia-induced high production by the interstitial fibroblast-like cells,  
298 and that the kidney is the main and sole site of Epo production in response to hypoxia or  
299 anaemia. Our method will fundamentally change Epo doping and detection.

300 **References**

- 301 1. Lopez A, Cacoub P, MacDougall IC, Peyrin-Biroulet L. Iron deficiency anaemia. *Lancet*  
302 2016;387: 907–916. Pmid 26314490
- 303 2. Haase VH. Regulation of erythropoiesis by hypoxia-inducible factors. *Blood Rev.*  
304 2013;27: 41–53. Pmid 23291210
- 305 3. Koury MJ, Haase VH. Anaemia in kidney disease: harnessing hypoxia responses for  
306 therapy. *Nat. Rev. Nephrol.* 2015;11: 394–410. pmid 26055355
- 307 4. Kobayashi H, Lui Q, Binns TC, et al. Distinct subpopulations of FOXD1 stroma-derived  
308 cells regulate renal erythropoietin. *J. Clin. Invest.* 2016;126: 1926–1938. pmid 27088801
- 309 5. Koury ST, Bondurant MC, Koury MJ. Localization of erythropoietin synthesizing cells in  
310 murine kidneys by *in situ* hybridization. *Blood* 1988;71: 524–527. pmid 3337914
- 311 6. Lacombe C, Da Silva JL, Bruneval P, et al. Peritubular cells are the site of erythropoietin  
312 synthesis in the murine hypoxic kidney. *J. Clin. Invest.* 1988;81: 620–623. pmid 3339134
- 313 7. Semenza GL, Koury ST, Nejfelt MK, Gearhart JD, Antonarakis SE. Cell-type-specific  
314 and hypoxia-inducible expression of the human erythropoietin gene in transgenic mice.  
315 *Proc. Natl. Acad. Sci. U. S. A.* 1991;88: 8725–8729. pmid 1924331
- 316 8. Pan X, Suzuki N, Hirano I, et al. Isolation and characterization of renal erythropoietin-  
317 producing cells from genetically produced anemia mice. *PLoS One* 2011;6: e25839. pmid

318 22022454

319 9. Eckardt KU, Dittmer J, Neumann R, Bauer C, Kurtz A. Decline of erythropoietin  
320 formation at continuous hypoxia is not due to feedback inhibition. *Am. J. Physiol.*

321 1990;258: F1432–F1437. pmid 2337157

322 10. Tan CC, Eckardt KU, Firth JD, Ratcliffe PJ. Feedback modulation of renal and hepatic  
323 erythropoietin mRNA in response to graded anemia and hypoxia. *Am. J. Physiol.*

324 1992;263: F474–F481. pmid 1415576

325 11. Lundby AK, Keiser S, Siebenmann C, Schaffer L, Lundby C. Kidney-synthesized  
326 erythropoietin is the main source for the hypoxia-induced increase in plasma

327 erythropoietin in adult humans. *Eur. J. Appl. Physiol.* 2014;114: 1107–1111. pmid

328 24531592

329 12. Eckardt KU, Kurtz A, Hirth P, Scigalla P, Wiczorek L, Bauer C, et al. Evaluation of the  
330 stability of human erythropoietin in samples for radioimmunoassay. *Klin. Wochenschr.*

331 1988;66: 241–245. pmid 3367616

332 13. Obara N, Suzuki N, Kim K, et al. Repression via the GATA box is essential for tissue-  
333 specific erythropoietin gene expression. *Blood* 2008;111: 5223–5232. pmid 18202227

334 14. Fried W. The liver as a source of extrarenal erythropoietin production. *Blood* 1972;40:  
335 671–677. pmid 4637502

336

337 15. Miyake T, Kung CK, Goldwasser E. Purification of human erythropoietin. *J. Biol. Chem.*  
338 1977;252: 5558–5564. pmid 18467

339 16. Jacobs K, Shoemaker C, Rudersdorf R, et al. Isolation and characterization of genomic  
340 and cDNA clones of human erythropoietin. *Nature* 1985;313: 806–810. pmid 3838366

341 17. Kalantar-Zadeh K. History of erythropoiesis-stimulating agents, the development of  
342 biosimilars, and the future of anemia treatment in nephrology. *Am. J. Nephrol.* 2017;45:  
343 235–247. pmid 28142147

344 18. Reichel C. Recent developments in doping testing for erythropoietin. *Anal. Bioanal.*  
345 *Chem.* 2011;401: 463–481. pmid 21637931

346 19. Harmonization of analysis and reporting of erythropoiesis stimulating agents (ESAs) by  
347 electrophoretic techniques (TD2014ZEPO) in WADA Technical Document  
348 (TD2019INDEX), 2019

349 20. Yasuoka Y, Izumi Y, Nagai T, et al. Fludrocortisone stimulates erythropoietin  
350 production in the intercalated cells of the collecting ducts. *Biochem. Biophys. Res.*  
351 *Commun.* 2018;503: 3121–3127. pmid 30146260

352 21. Grocott MP, Martin DS, Levett DZ, McMorrow R, Windsor J, Montgomery HE. Arterial  
353 blood gases and oxygen content in climbers on Mount Everest. *N. Engl. J. Med.*  
354 2009;360: 140–149. pmid 19129527

- 355 22 Nonoguchi H, Owada A, Kobayashi N, et al. Immunohistochemical localization of V2  
356 vasopressin receptor along the nephron and functional role of luminal V2 receptor in  
357 terminal inner medullary collecting ducts. *J. Clin. Invest.* 1995;96: 1768–1778. pmid  
358 7560068
- 359 23. Yasuoka Y, Sato Y, Healy J, Nonoguchi H, Kawahara K. pH-sensitive expression of  
360 calcium-sensing receptor (CaSR) in type-B intercalated cells of the cortical collecting  
361 ducts (CCD) in mouse kidney. *Clin. Exp. Nephrol.* 2015;19: 771–782. pmid 25500736
- 362 24. Nagai T, Yasuoka Y, Izumi Y, et al. Reevaluation of erythropoietin production by the  
363 nephron. *Biochem. Biophys. Res. Commun.* 2014;449: 222–228. pmid 24832733
- 364 25. Takahashi D, Kawamura Y, Yamashita T, Uemura M. Detergent-resistant plasma  
365 membrane proteome in Oat and Rye: similarities and dissimilarities between two  
366 monocotyledonous plants. *J. Proteome Res.* 2012;11: 1654–1665. pmid 22191623
- 367 26. Rosenberger C. Expression of hypoxia-inducible factor1 and -2 in hypoxic and ischemic  
368 rat kidneys. *J. Am. Soc. Nephrol.* 2002;13: 1721–1732. pmid 12089367
- 369 27. Paliege A, Rosenberger C, Bondke A, et al. Hypoxia-inducible factor-2alpha-expressing  
370 interstitial fibroblasts are the only renal cells that express erythropoietin under hypoxia-  
371 inducible factor stabilization. *Kidney Int.* 2010;77: 312–318. pmid 20016470
- 372 28. Lee FS, Percy MJ. The HIF pathway and erythrocytosis. *Annu. Rev. Pathol.* 2011;6:

373 165–192. pmid 20939700

374 29. Mujais SK, Beru N, Pullman TN, Goldwasser E. Erythropoietin is produced by tubular

375 cells of the rat kidney. *Cell Biochem. Biophys.* 1999;30: 153–166. pmid 10099826

376 **Figure Legends**

377 **Fig. 1. Comparison of AE7A5 and sc-5290.** **A.** Plasma and concentrated urine from anemic  
378 patients were used for western blotting with or without deglycosylation. Although both AE7A5  
379 and sc-5290 recognize Epo at 34-43 and 22 kDa, the specificity of sc-5290 was better than that  
380 of AE7A5 especially after deglycosylation. **B.** The kidney cortex from hypoxic rats were used  
381 for western blotting. Although a 34-43 kDa band by sc-5290 became pale after deglycosylation,  
382 same band by AE7A5 remains strong after deglycosylation. hEpo; recombinant human Epo,  
383 rEpo; recombinant rat Epo.

384 **Fig.2. Detection of Epo and ESAs in urine by western blotting.** **A1.** Expression of  
385 recombinant human Epo and ESAs detected by Western blotting. Recombinant human Epo  
386 shows a broad band at 34-43 kDa. Epoetin  $\alpha$  and  $\beta$ , darbepoetin and epoetin  $\beta$  pegol gradually  
387 increased in size. Deglycosylation shifted all human Epo and ESAs to 22 kDa except PEG-bound  
388 epoetin  $\beta$  pegol. Lane 1: recombinant human Epo; Lane 2, epoetin  $\alpha$ ; lane 3, epoetin  $\beta$ ; lane 4,  
389 darbepoetin; and lane 5, epoetin  $\beta$  pegol. The left and right lanes of each peptide are without and  
390 with deglycosylation, respectively. **A2.** Expression of rat (lane 6), mouse (lane 7) and human  
391 Epo (lane 8). Rat, mouse and human Epo showed the same expression at 34-43 kDa, and  
392 deglycosylation shifted all bands to 22 kDa. **B1.** Expression of recombinant human Epo in  
393 glycosylated (blue line) and deglycosylated forms (red line). The detection limits of glycosylated



394 and deglycosylated human Epo were 370 and 37 pg, respectively. **B2.** The detection limit of  
395 glycosylated and deglycosylated recombinant rat Epo was 370 and 3.7 pg, respectively. **C.**  
396 Detection of intrinsic Epo in human urine. Urine from anemic patient was applied to the western  
397 blot: 2.3, 29 and 86  $\mu$ l samples of urine (Epo concentration 152 mIU/ml) were concentrated by  
398 Vivaspin and used in lanes 1, 2 and 3, respectively. Deglycosylated Epo was observed in more  
399 than 29  $\mu$ l of urine. A, B: glycosylated and deglycosylated recombinant human Epo,  
400 respectively. Green line, direct application; blue line, incubation with deglycosylation buffer; and  
401 red line, after deglycosylation. **D.** Detection of ESAs in rat urine. Male SD rats (200 g) were  
402 injected with epoetin  $\alpha$  (600  $\mu$ g), darbepoetin (4.5  $\mu$ g) and epoetin  $\beta$  pegol (3.8  $\mu$ g), and urine  
403 was obtained after 30 min. The plasma Epo concentrations of each rat were 37,800, 29,400 and  
404 527 mIU/ml for epoetin  $\alpha$ , darbepoetin and epoetin  $\beta$  pegol, respectively. The direct analysis of  
405 urine (5  $\mu$ l) showed a clear and broad band of epoetin  $\alpha$  (sample 1) at 34-43 kDa. The band of  
406 darbepoetin (sample 2) was pale and that of epoetin  $\beta$  pegol (sample 3) was not observed. The  
407 band of darbepoetin became slightly clearer after the incubation of urine with deglycosylation  
408 buffer (blue line). The bands of epoetin  $\alpha$  and darbepoetin were shifted to 22 kDa. The  
409 deglycosylated band of darbepoetin (sample 2 in red line) was clearer than the glycosylated  
410 band. Since the rat urine samples were very small, the urine Epo concentration was not  
411 measured. A and B: glycosylated and deglycosylated rat Epo, respectively.

412 **Fig.3. Detection of Epo and ESAs in plasma. A.** Detection of intrinsic rat Epo in control and  
413 hypoxic rats. Although no bands were observed by in the direct analysis of plasma (2  $\mu$ l) (green  
414 line), the incubation of plasma from hypoxic rats (7  $\mu$ l) with deglycosylation buffer (blue line)  
415 resulted in the appearance of Epo bands at 34-43 kDa, which were shifted to 22 kDa by  
416 deglycosylation (red line). Lanes 1-2, control rats. Lanes 3-4, hypoxic rats. The plasma Epo  
417 concentrations in each rat were 0.7, 3.2, 356 and 645 mIU/ml, respectively. The green, blue and  
418 red lines show direct application and incubation with deglycosylation buffer without and with  
419 PNGase, respectively. **B.** Detection of intrinsic human Epo in the plasma of a patient with severe  
420 anemia. Plasma was obtained under severe and mild anaemia and after recovery (plasma  
421 haemoglobin levels were 5.5, 9.0, and 13.1 g/dl, respectively). No bands were observed with the  
422 direct analysis of plasma (2  $\mu$ l). Incubation of plasma (5  $\mu$ l) with deglycosylation buffer revealed  
423 the band at 36-40 kDa only under anemic conditions, and the bands were shifted to 22 kDa.  
424 Plasma Epo concentrations were 1,200, 180, and 8.4 mIU/ml, respectively. A, B; glycosylated  
425 and deglycosylated recombinant human Epo, respectively. **C.** Detection of ESAs in rats injected  
426 with a large doses of ESAs. Male SD rats were injected with epoetin  $\alpha$ , darbepoetin and epoetin  
427  $\beta$  pegol as described in Fig. 2D, and blood was obtained after 30 min. The bands of epoetin  $\alpha$   
428 and epoetin  $\beta$  pegol were observed by the direct analysis of plasma (2  $\mu$ l), while the band of  
429 darbepoetin was obscured by a non-specific band (green line). Incubation of plasma (5  $\mu$ l) with

430 deglycosylation buffer reduced the non-specific band, and the band of darbepoetin became clear  
431 (blue line). The bands of epoetin  $\alpha$  and darbepoetin shifted to 22 kDa, while the band of epoetin  
432  $\beta$  pegol was slightly reduced in size (red line). A, B; glycosylated and deglycosylated  
433 recombinant rat Epo, respectively. **D.** Detection of plasma ESA in patients. Plasma samples from  
434 patients treated with epoetin  $\beta$  pegol and control subjects were subjected to western blotting. No  
435 bands were observed by the direct analysis of plasma (2  $\mu$ l) (green line). The incubation of  
436 plasma (3.5  $\mu$ l) with deglycosylated buffer revealed the band corresponding to epoetin  $\beta$  pegol in  
437 patient 1 at 95-130 kDa (blue line). The band was shifted to 80-95 kDa by deglycosylation (red  
438 line). The plasma Epo concentrations of each subject were 202, 13, and 7.5 mIU/ml,  
439 respectively. Patient 1: serum creatinine 11.93 mg/dl, Hb 8.2, epoetin  $\beta$  pegol injection 3 days  
440 before. Patient 2: serum creatinine 3.15 mg/dl, Hb 10.8 g/dl, epoetin  $\beta$  pegol injection 28 days  
441 before. Patient 3: serum creatinine 0.73 mg/dl, Hb 15.1 g/dl, no injection. A, B: glycosylated and  
442 deglycosylated recombinant human Epo, respectively. C, D: glycosylated and deglycosylated  
443 epoetin  $\beta$  pegol, respectively.

444 **Fig. 4. LC/MS detection of recombinant and intrinsic Epo. A,B.** Deglycosylated  
445 recombinant human Epo and urine samples of anemic patients were subjected to SDS-PAGE and  
446 negative staining. The 22 kDa bands were excised and subjected to LC/MS. Although the  
447 recombinant human Epo (8.3 ng) was analysed by negative staining (lane 3), no 22 kDa band

448 was observed in the human urine samples (concentrated from 3.1 ml of urine, lanes 1, 2, 4 and  
449 5). **C.** Western blotting of urine sample used for LC/MS analysis. 12.5  $\mu$ l of concentrated urine  
450 was used in Fig.C and 15 $\mu$ l of concentrated urine was used for Fig. A. **D.** MS/MS spectra of  
451 recombinant human Epo peptides:  $^{73}$ VNFYAWK $^{79}$ . The red line shows the expected peptides,  
452 and the black line shows the observed peptides.

453 **Fig. 5. Effects of hypoxia on Epo mRNA expression in the kidney and liver. A-D.** Effects of  
454 severe hypoxia on the mRNA expression of Epo (A), HIF1 $\alpha$  (B), HIF2 $\alpha$  (C) and PHD2 (D) in  
455 the kidney and liver. Severe hypoxia increased HIF1 $\alpha$ , HIF2 $\alpha$  and PHD2 mRNA expression  
456 after 1 hr in the kidney, which was followed by an increase in Epo mRNA expression at 2 hr. All  
457 of the above expressions levels decreased thereafter. In contrast, Epo mRNA expression in the  
458 liver increased up to 4 hr, which was not related to the changes in HIF1 $\alpha$ , HIF2 $\alpha$  and PHD2  
459 mRNA expression. n=3-4, K0, K1, K2 and K4; zero time, 1, 2 and 4 hr after the induction of  
460 hypoxia in the kidney. L0, L1, L2 and L4: same time course in the liver. **E.** Changes in plasma  
461 Epo concentration during severe hypoxia. The plasma Epo concentration significantly increased  
462 after 3 hr. n=3-7. \* p<0.05, \*\*p<0.001 using ANOVA and multiple comparison with Dunnett's  
463 test.

464 **Fig. 6. Effects of hypoxia on Epo protein expression in the kidney and liver. A, C, E.**

465 Western blot analysis of Epo expression in the kidney and liver. A typical gel is shown in Fig. A,

466 C and E, and the analysed data are shown in Fig. B, D and F. Severe hypoxia increased Epo  
467 protein expression in the kidney at 4 hr by 10-fold but did not increase Epo protein expression in  
468 the liver (A, B). n=4, \* p<0.05. Western blot analysis of Epo protein expression after  
469 deglycosylation in the kidney (C) and the liver (E). Glycosylated Epo protein expression  
470 increased by 20-fold after 4 hr (D). Deglycosylated Epo expression was observed from zero time  
471 to 4 hr. The expression increased by 400-fold after 4 hr (F), which was close to the changes in  
472 the plasma Epo concentration (Fig. 5E). In contrast, Epo protein expression in liver did not  
473 increase under hypoxia (E, F). n=4-6, \* p<0.05 using the Kruskal-Wallis test and multiple  
474 comparisons by the Shirley-Williams test.

475 **Fig. 7. Immunohistochemical analysis of Epo protein expression in the kidney.** Epo protein  
476 was observed in proximal and distal tubules at 21% O<sub>2</sub> (A, C). Severe hypoxia (7% O<sub>2</sub>, 4 hr)  
477 increased Epo protein expression in the interstitial cells (arrowhead) while slightly decreasing the  
478 expression in the tubules (B, D).

479

480 **Table. 1. A-C.** LC/MS analysis of the 22 kDa band of recombinant human Epo (8.3 ng),  
481 concentrated human urine from anaemic patients and recombinant rat Epo (4.4 pg), respectively.  
482 Matched peptides are shown in bold red. **D-F.** Detailed LC/MS data on matched peptides of  
483 recombinant human Epo (D), human urine sample (E) and recombinant rat Epo (F).



485 **Acknowledgements**

486 Our manuscript was edited for proper English language by NPG Language Editing Service  
487 (4221-D9DA-8D07-E1B1-3D9P).

488 **Funding**

489 This study was supported by a Grant-in Aid for Scientific Research from the Ministry of  
490 Education, Culture, Sports, Sciences and Technology of Japan (24591244, 26461259, 26893202,  
491 16K19493, 16K08505, 17K16578 and 19K09226) and by the Science Research Promotion Fund  
492 from the Promotion and Mutual Aid Corporation for Private Schools of Japan.

493

494 **Author contributions**

495 YY, YI, KK and HN designed the research; YY, YN, HI, YoS, YN, and HN performed the  
496 animal research; YI, TF, KY, TU, and HN performed western blot analysis; YY, TO, YuS, and  
497 KK performed IHC, TF, TaY, NK and HN performed RNA extraction and PCR; YI and HN  
498 performed the statistical analyses; and TeY performed LC/MS. MM and YuS advised on the  
499 experimental design and data interpretation.

500

501 **Competing interests**

502 The authors have no financial conflicts to declare.

503

504 **Additional information**

505 Correspondence and requests for materials should be addressed to E-mail: nono@insti.kitasato-

506 u.ac.jp.

507



Figure.1

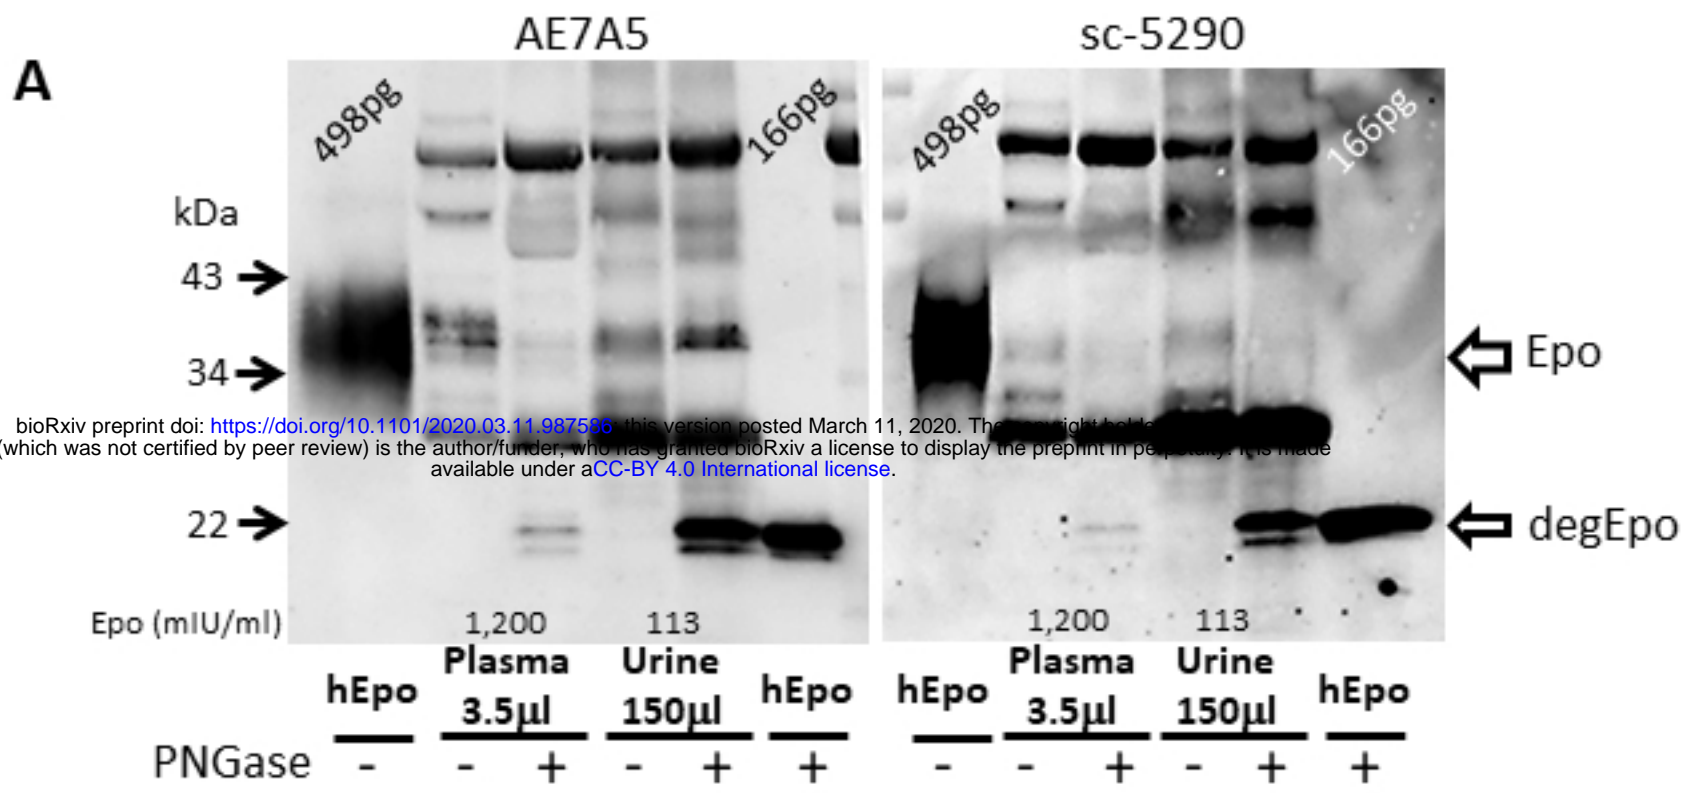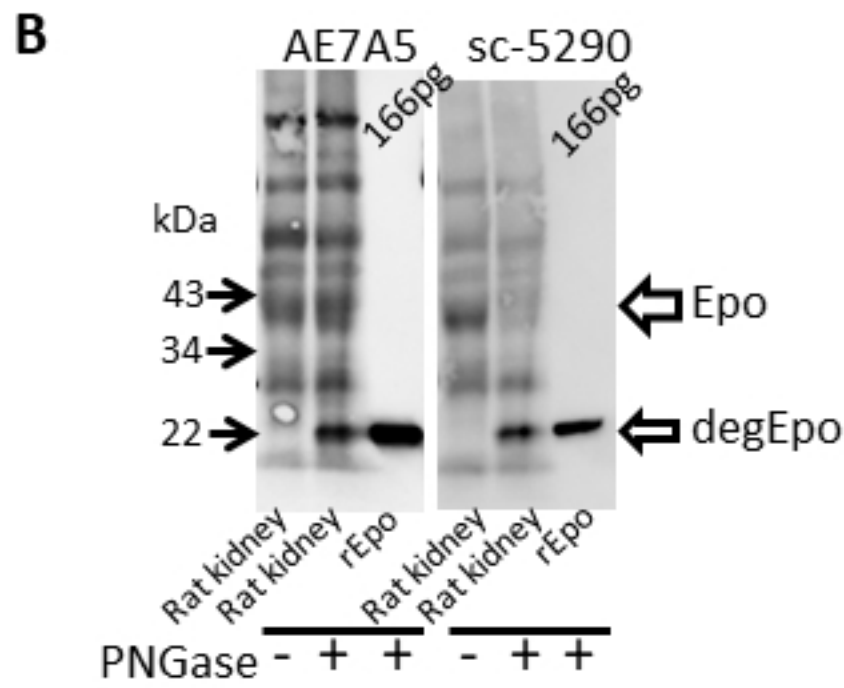

Fig.1

Figure.2

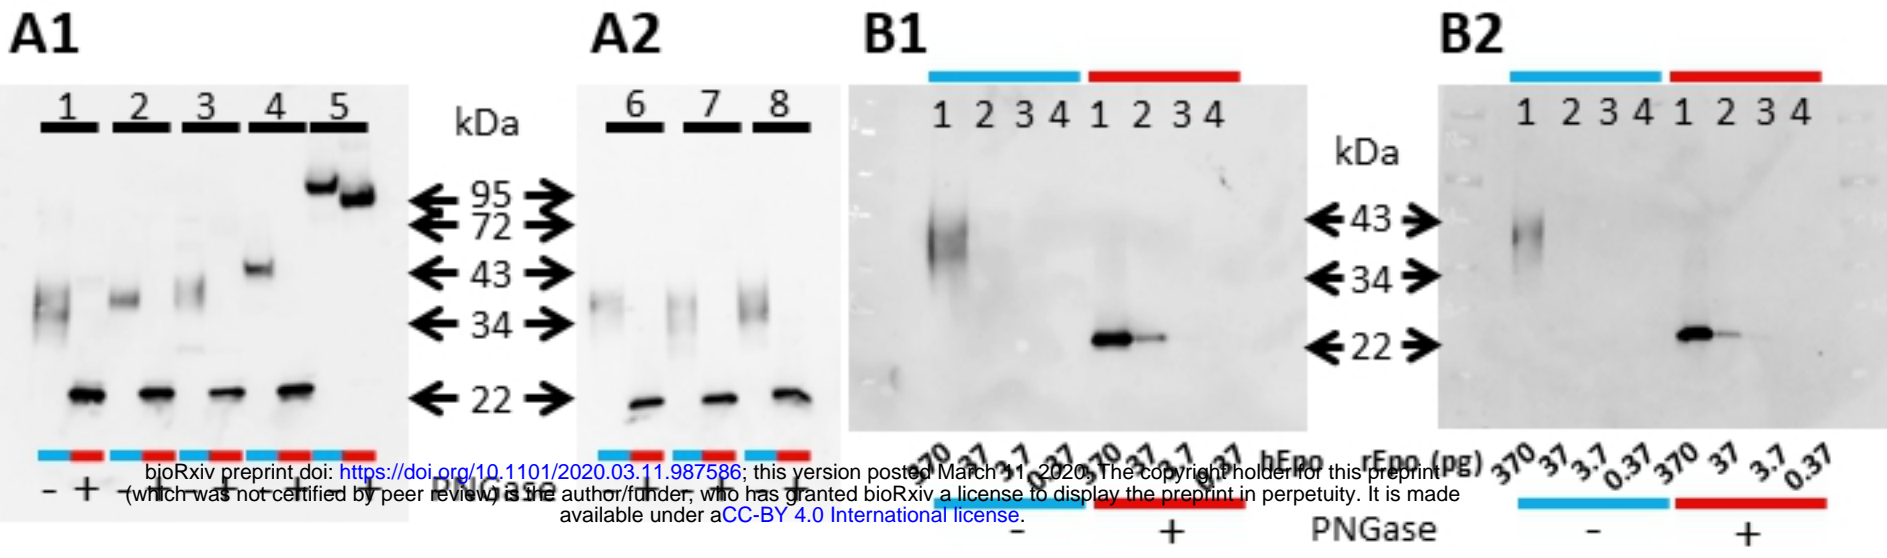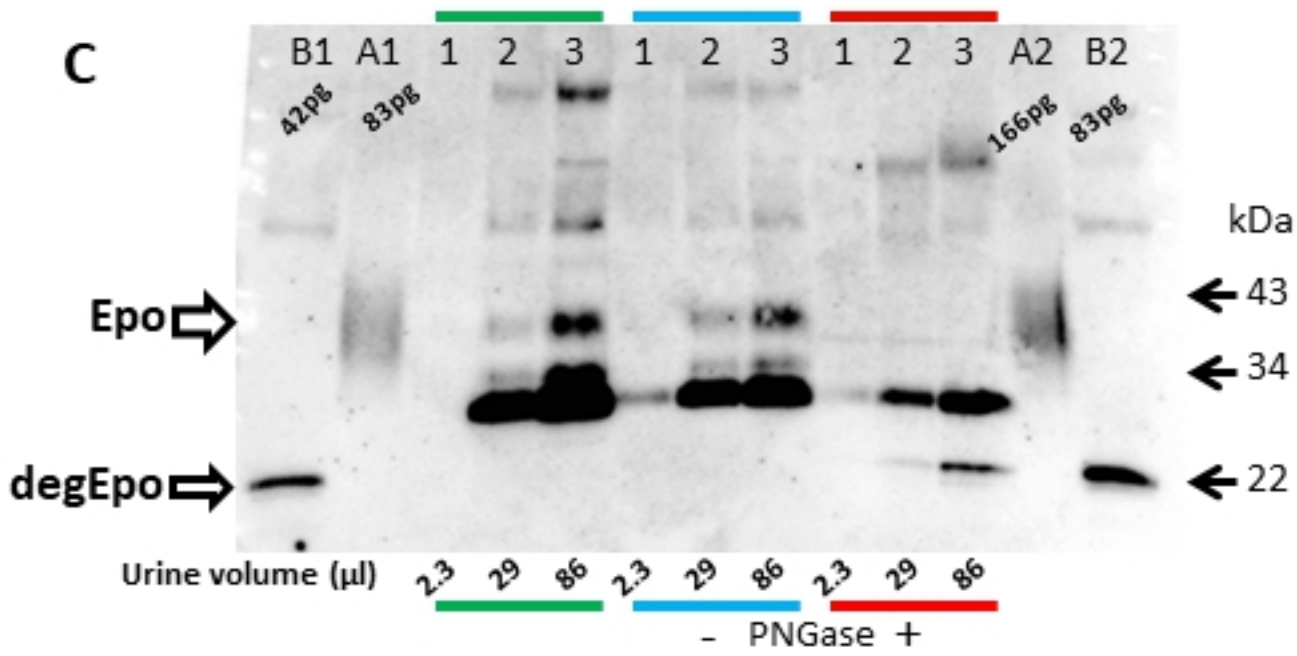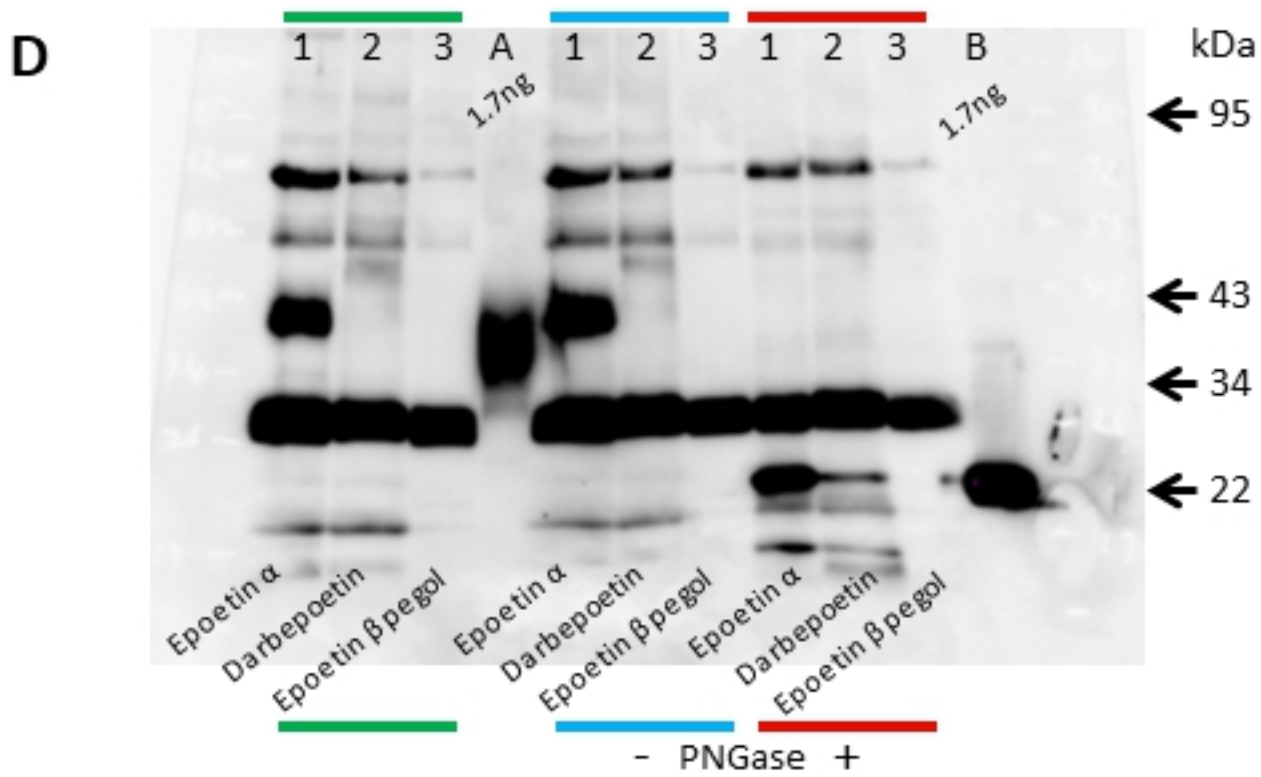

Fig.2

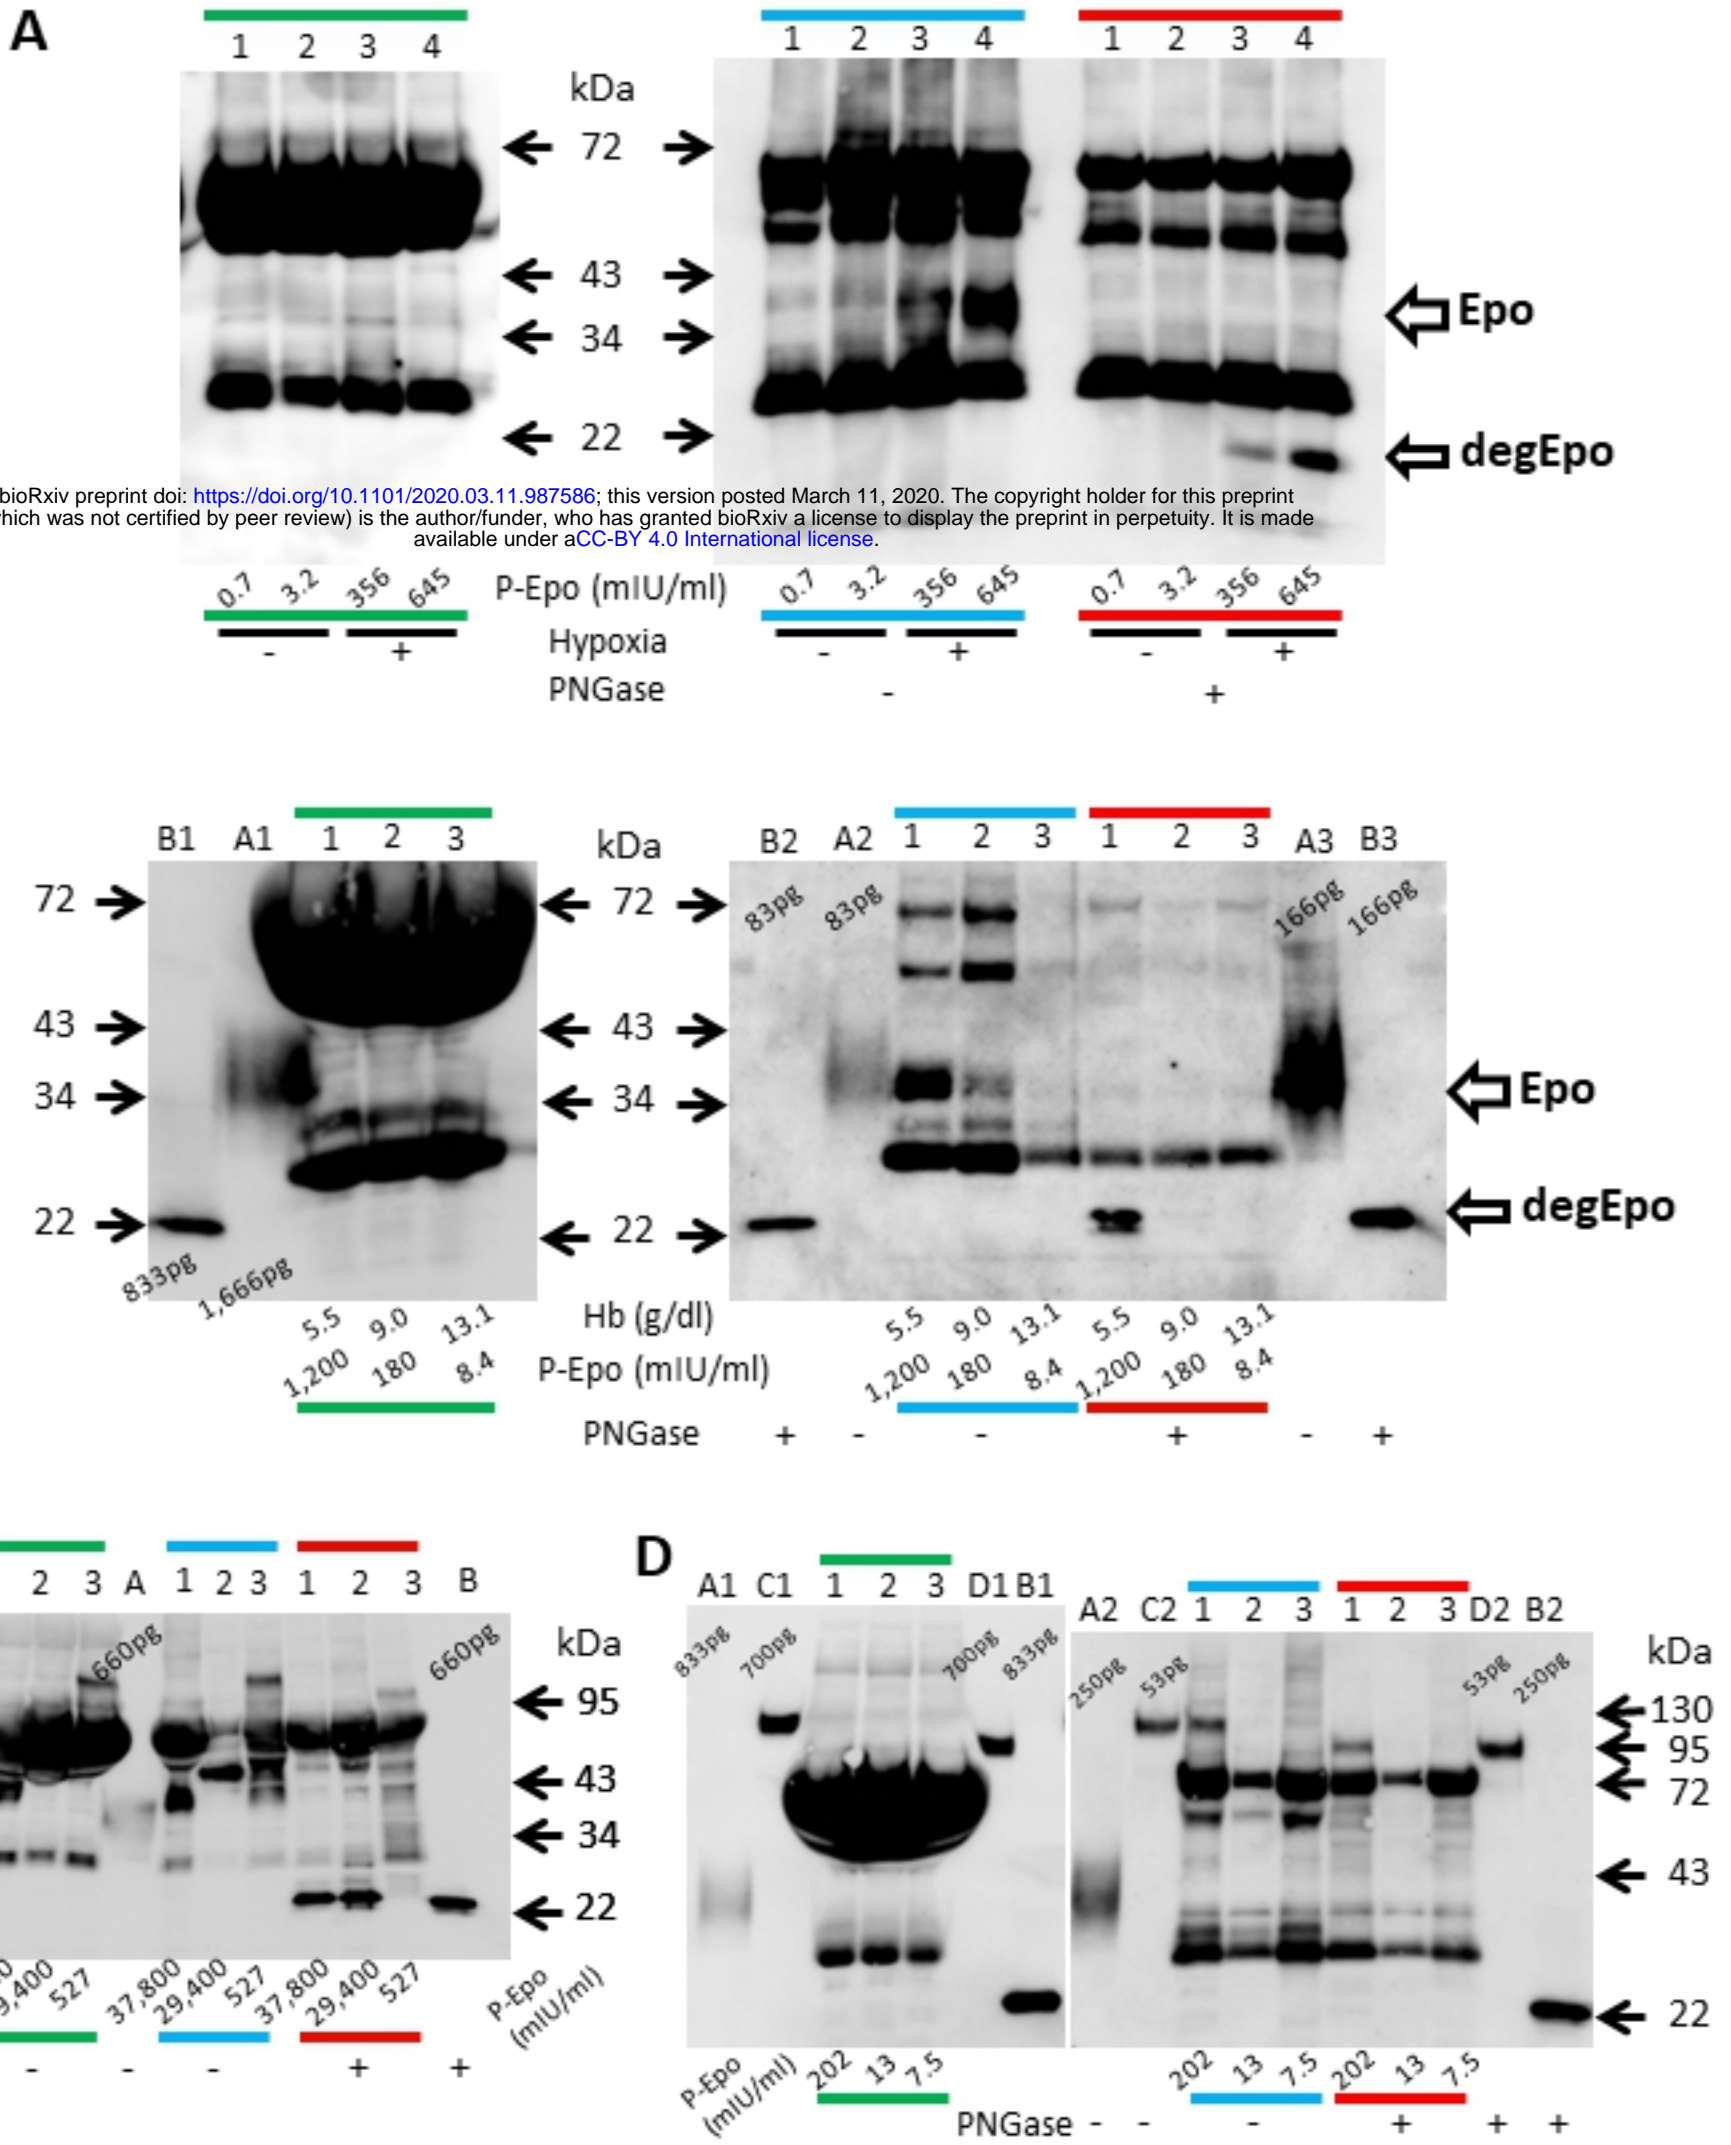

Fig.3

bioRxiv preprint doi: <https://doi.org/10.1101/2020.03.11.987586>; this version posted March 11, 2020. The copyright holder for this preprint (which was not certified by peer review) is the author/funder, who has granted bioRxiv a license to display the preprint in perpetuity. It is made available under aCC-BY 4.0 International license.

Figure 4

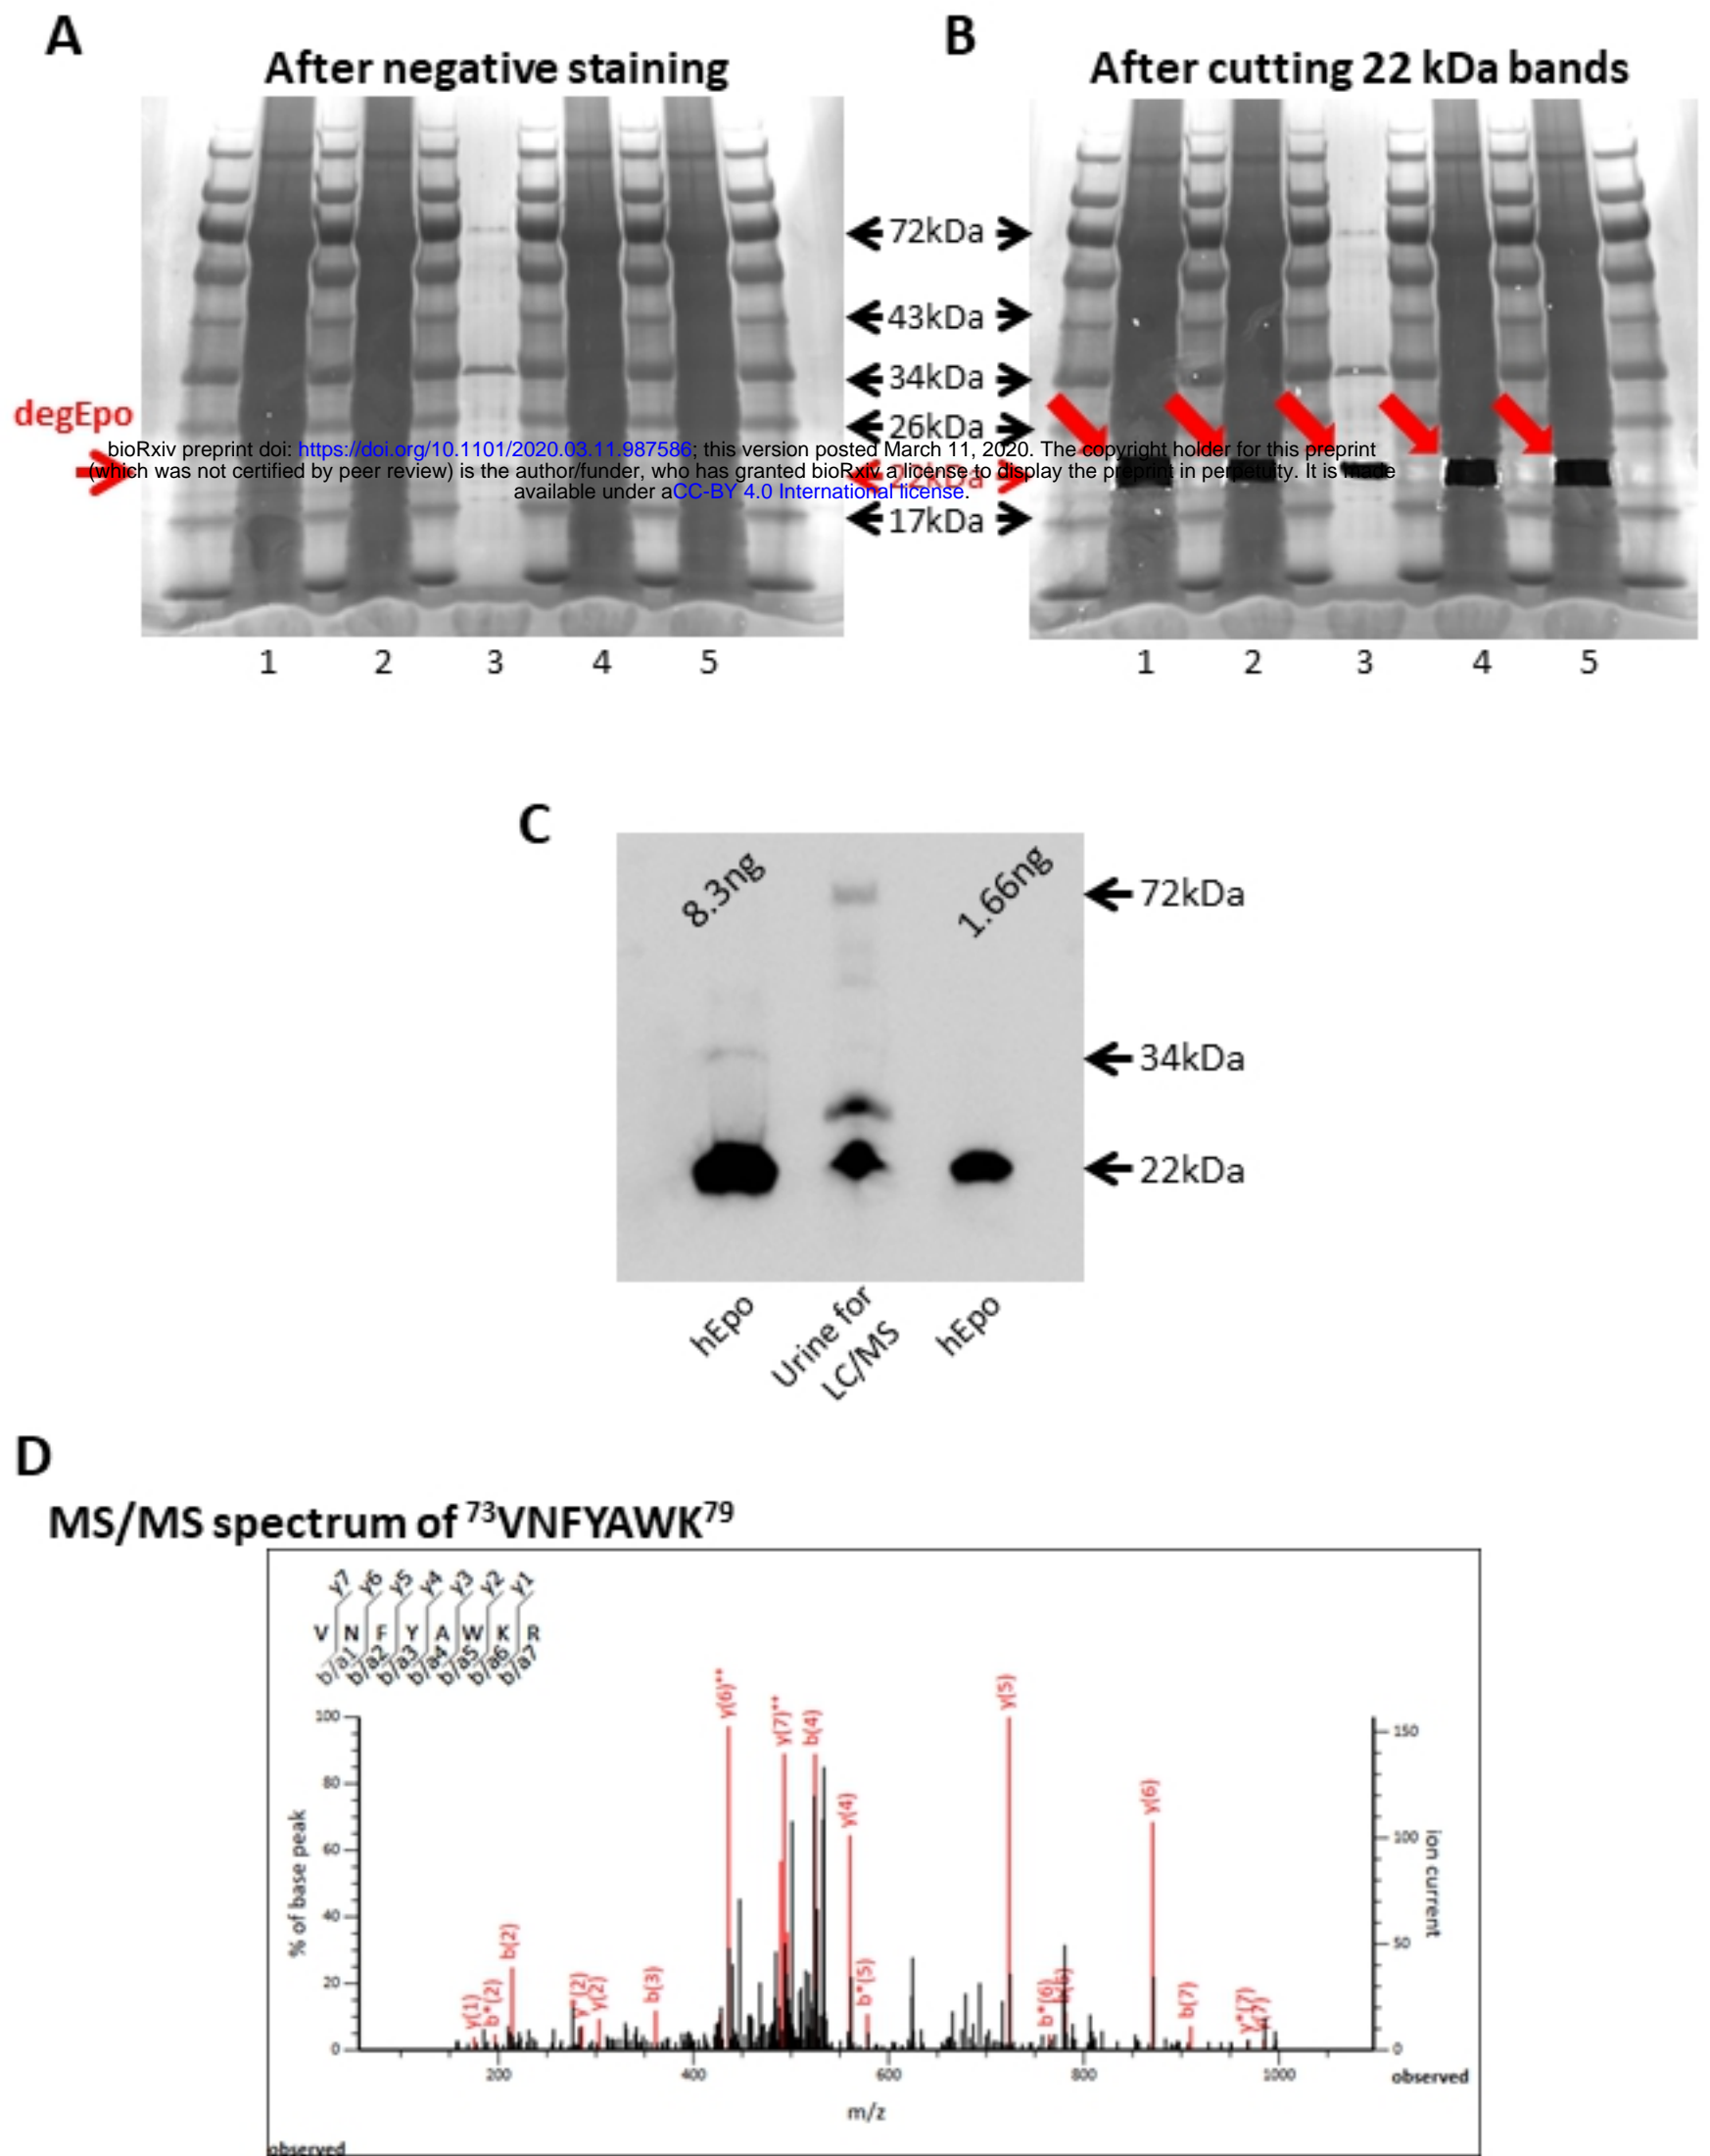

Fig.4



**Figure.6**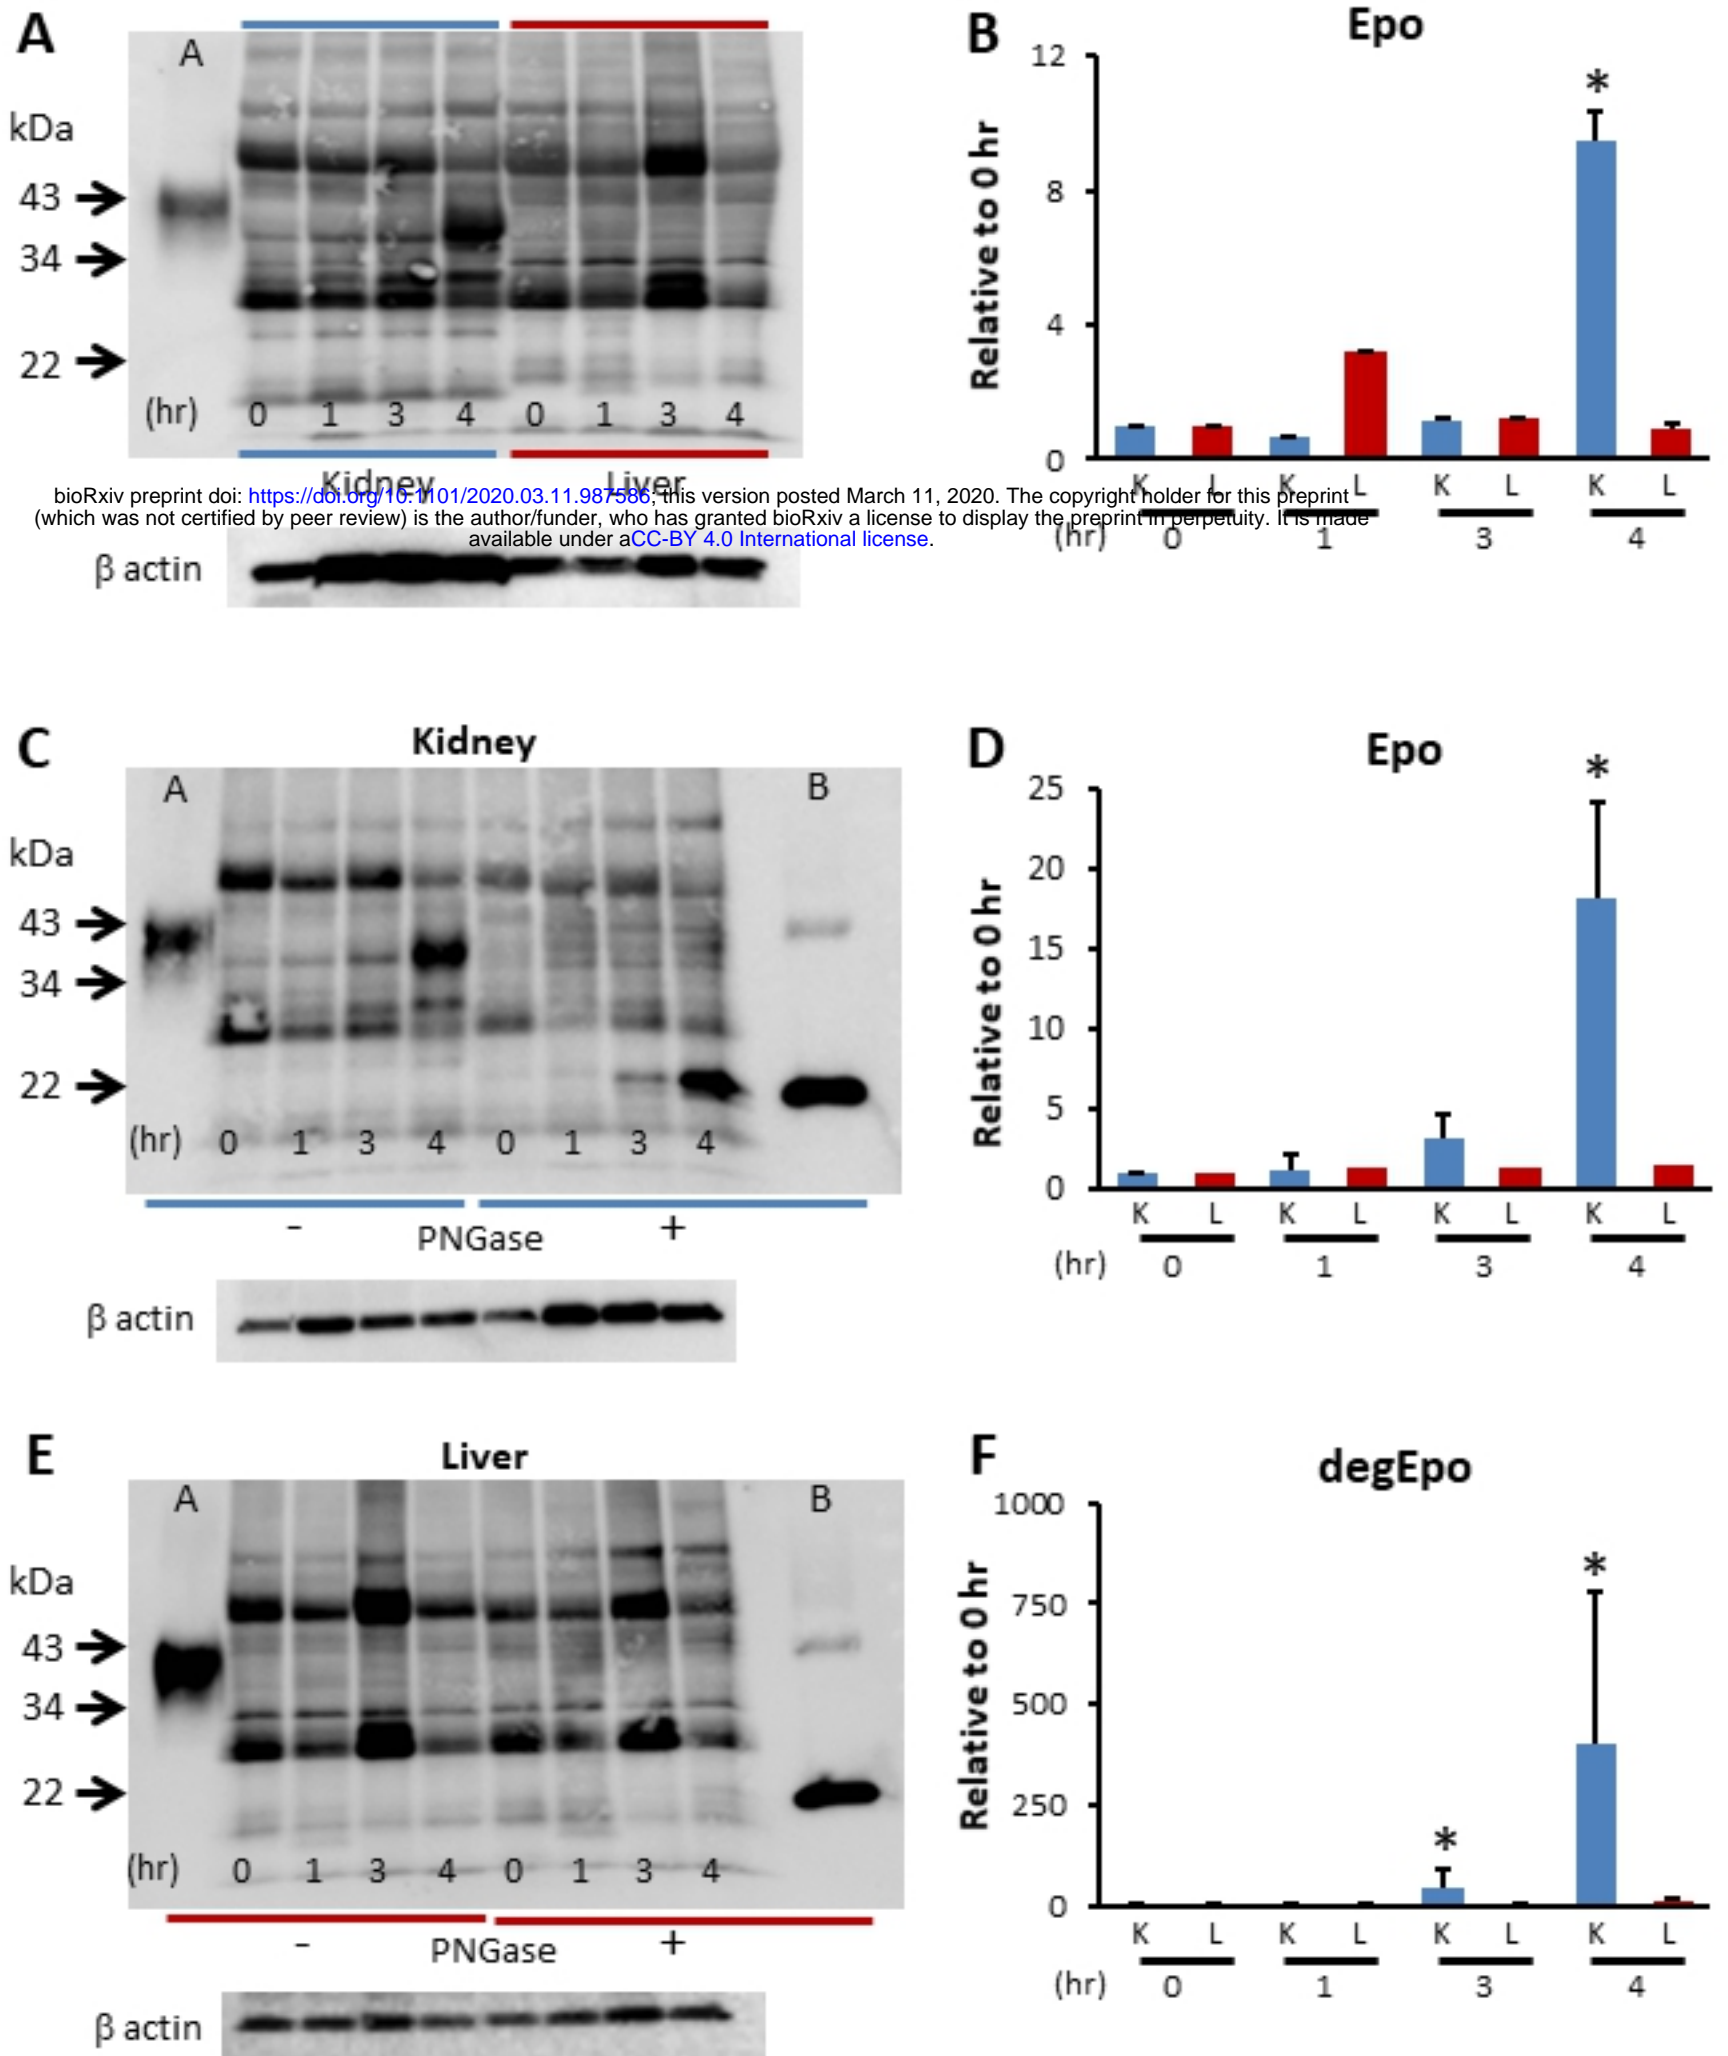**Fig. 6**



Figure.7

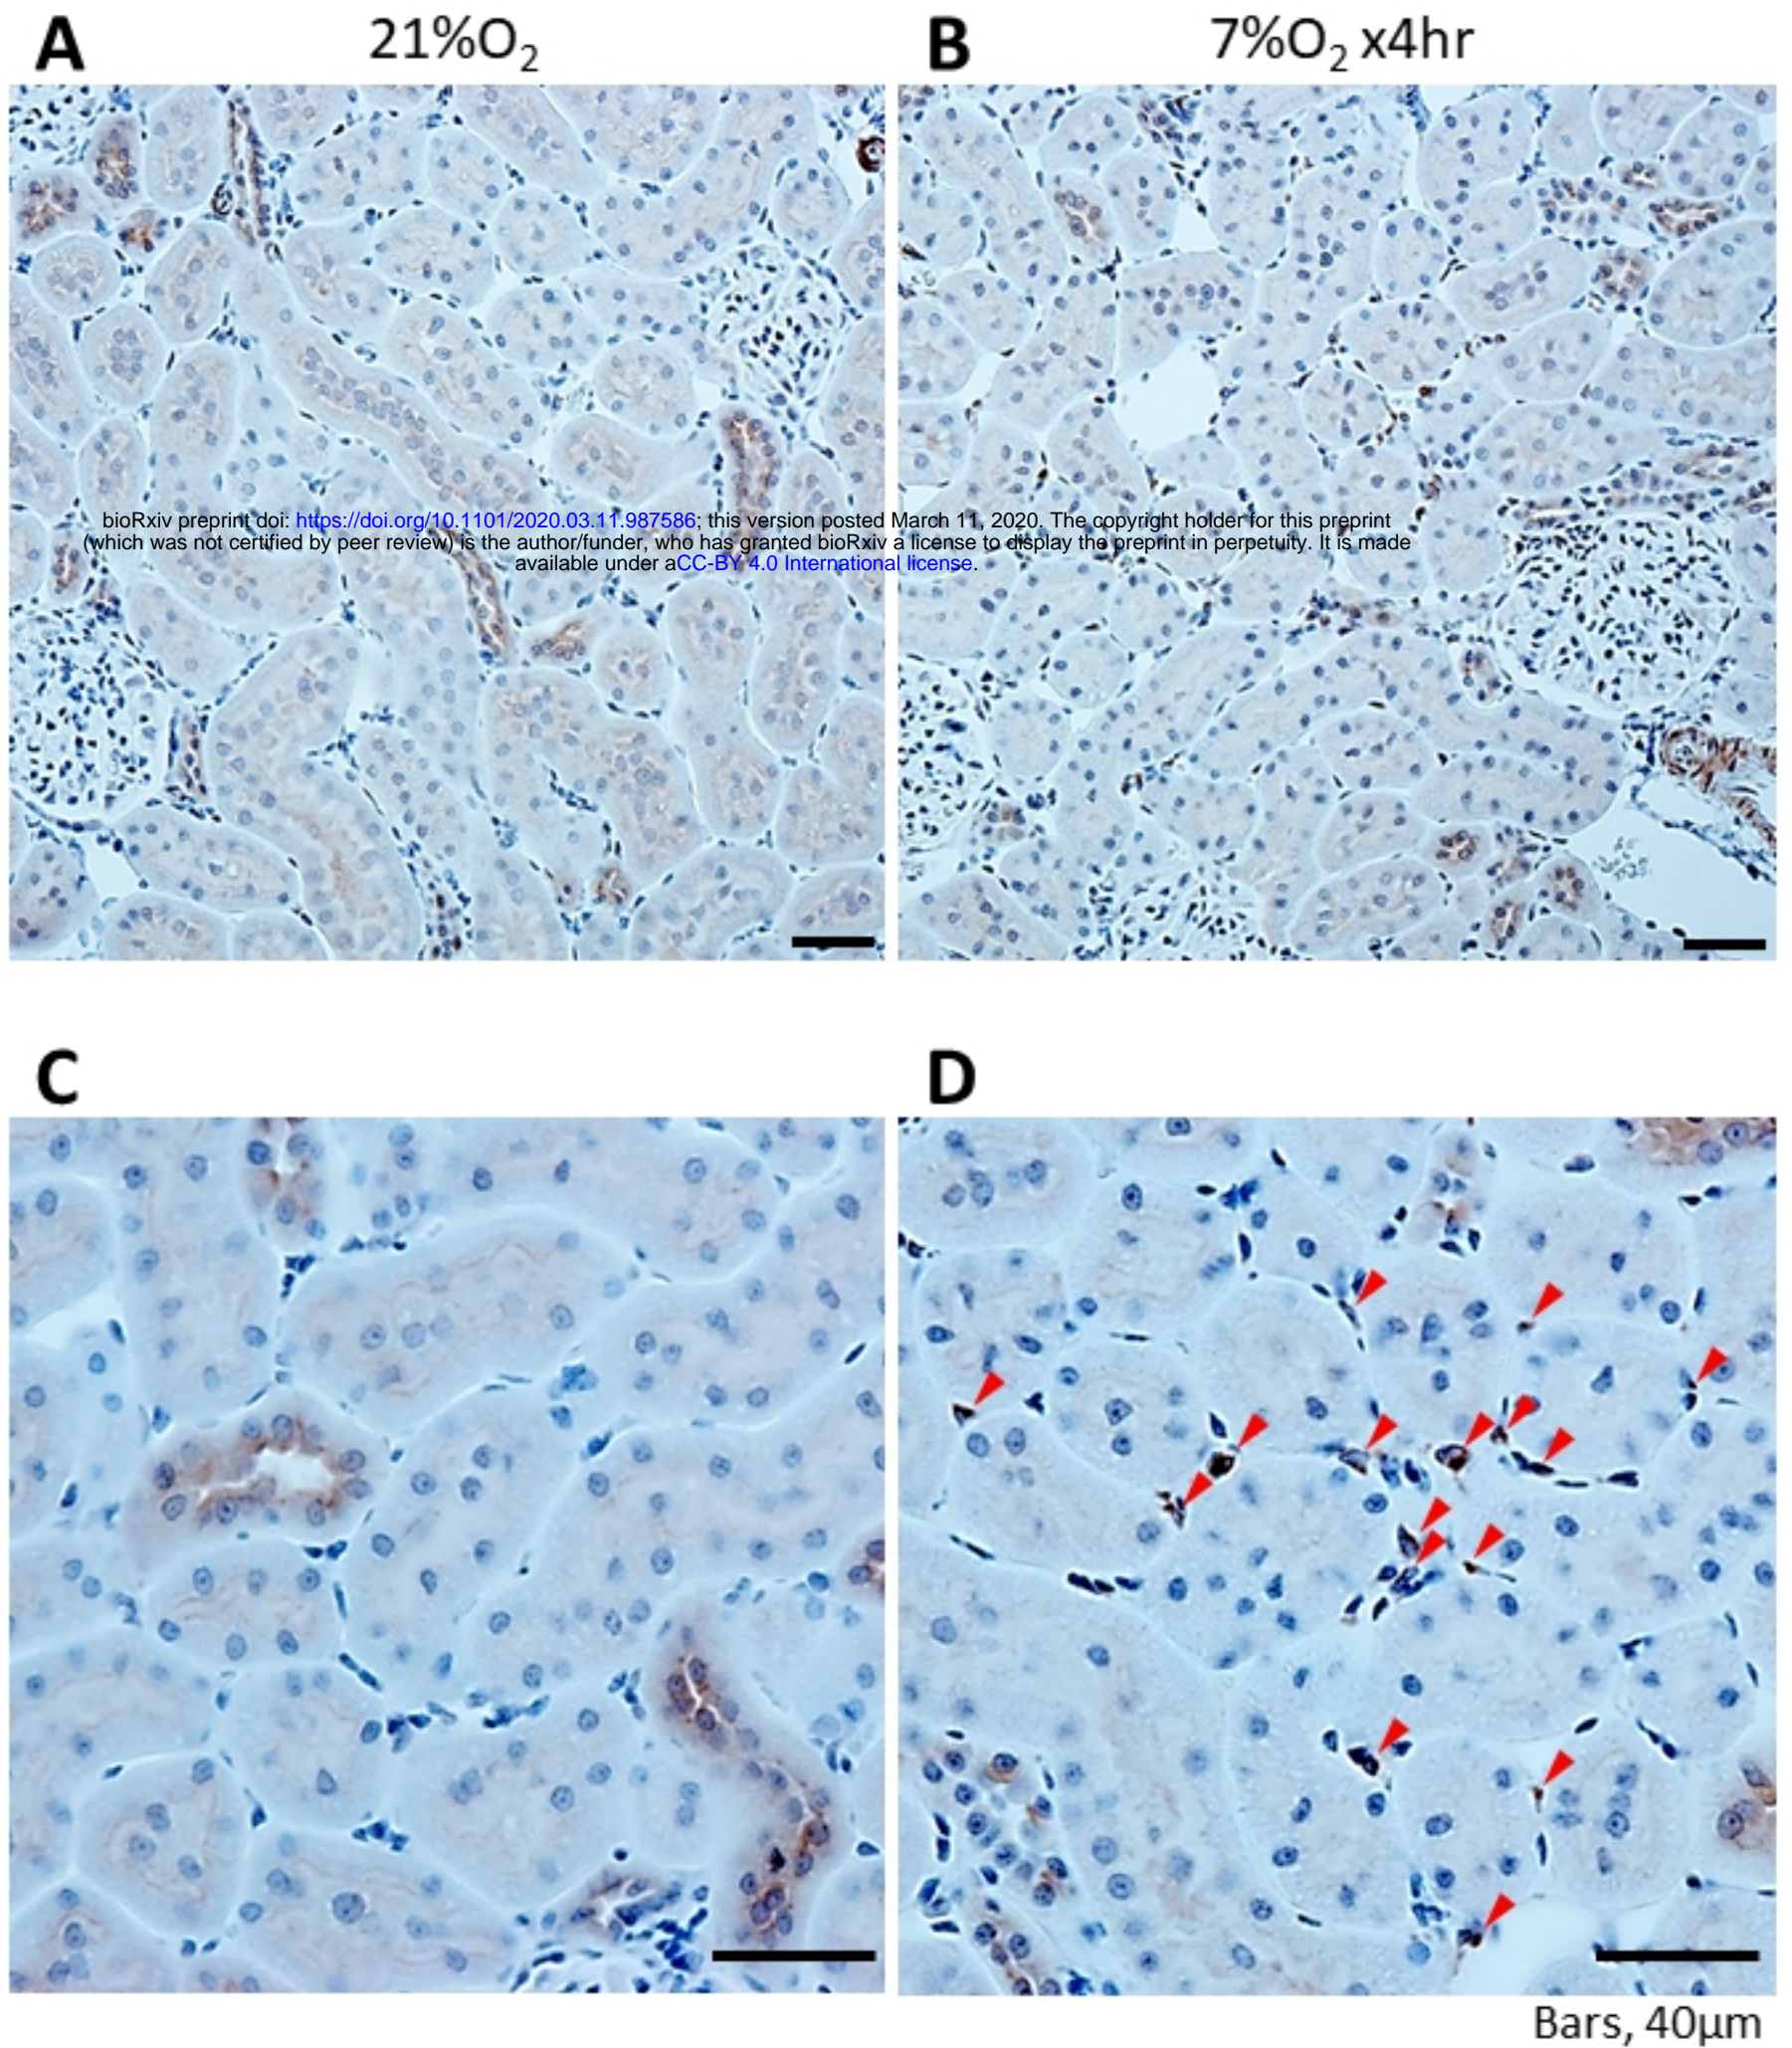

Fig.7



**Table 1****A Human (Recombinant): Coverage 20%**

1            MGVHECPAWL WLLLSLLSLP LGLPVLGAPP RLICDSRVLE RYLLEAKEAE  
 51           NITTGCAEHC SLNENITVPD TKVNFYAWKR MEVGQQAVEV WQGLALLSEA  
 101          VLRGQALLVN SSQPWEPLQL HVDKAVSGLR SLTTLLRALG AQKEAISPPD  
 151          AASAAPLRTI TADTFRKLFR VYSNFLRGKL KLYTGEACRT GDR

**B Human urine: Coverage 12%**

bioRxiv preprint doi: <https://doi.org/10.1101/2020.03.11.987586>; this version posted March 11, 2020. The copyright holder for this preprint (which was not certified by peer review) is the author/funder, who has granted bioRxiv a license to display the preprint in perpetuity. It is made available under aCC-BY 4.0 International license.

1            MGVHECPAWL WLLLSLLSLP LGLPVLGAPP RLICDSRVLE RYLLEAKEAE  
 51           NITTGCAEHC SLNENITVPD TKVNFYAWKR MEVGQQAVEV WQGLALLSEA  
 101          VLRGQALLVN SSQPWEPLQL HVDKAVSGLR SLTTLLRALG AQKEAISPPD  
 151          AASAAPLRTI TADTFRKLFR VYSNFLRGKL KLYTGEACRT GDR

**C Rat (recombinant): Coverage 16%**

1            MGVPERPTLL LLLSLLLIPL GLPVLCAAPP LICDSRVLER YILEAKEAEN  
 51           VTMGCAEGPR LSENITVPDT KVNIFYAWKRM KVEEQAVEVW QGLSLLSEAI  
 101          LQAQALQANS SQPPESLQLH IDKAISGLRS LTSLLRVLGA QKELMSPPDA  
 151          TQAAPLRTL ADTFCKLFRV YSNFLRGKLG LYTGEACRRG DR

| D | Peptide                                 | Observed | Mr (expt) | Mr (calc) | ppm   |
|---|-----------------------------------------|----------|-----------|-----------|-------|
|   | <sup>73</sup> VNFYAWK <sup>79</sup>     | 464.2393 | 926.4640  | 926.4650  | -1.14 |
|   | <sup>73</sup> VNFYAWKR <sup>80</sup>    | 542.2902 | 1082.5659 | 1082.5661 | -0.23 |
|   | <sup>131</sup> SLTTLLR <sup>137</sup>   | 402.2527 | 802.4909  | 802.4912  | -0.37 |
|   | <sup>159</sup> TITADTFR <sup>166</sup>  | 462.7429 | 923.4712  | 923.4713  | -0.09 |
|   | <sup>159</sup> TITADTFRK <sup>167</sup> | 526.7903 | 1051.5660 | 1051.5662 | -0.19 |
|   | <sup>171</sup> VYSNFLR <sup>177</sup>   | 449.7426 | 897.4706  | 897.4708  | -0.26 |
|   | <sup>182</sup> LYTGEACR <sup>189</sup>  | 485.2262 | 968.4378  | 968.4386  | -0.73 |

| E | Peptide                                 | Observed | Mr (expt) | Mr (calc) | ppm   |
|---|-----------------------------------------|----------|-----------|-----------|-------|
|   | <sup>159</sup> TITADTFRK <sup>167</sup> | 526.7901 | 1051.5656 | 1051.5662 | -0.53 |
|   | <sup>171</sup> VYSNFLR <sup>177</sup>   | 449.7425 | 897.4705  | 897.4708  | -0.39 |
|   | <sup>182</sup> LYTGEACR <sup>189</sup>  | 485.2267 | 968.4387  | 968.4386  | 0.20  |

| F | Peptide                                 | Observed | Mr (expt) | Mr (calc) | ppm   |
|---|-----------------------------------------|----------|-----------|-----------|-------|
|   | <sup>72</sup> VNFYAWKR <sup>79</sup>    | 542.2902 | 1082.5658 | 1082.5661 | -0.34 |
|   | <sup>158</sup> TLTADTFCK <sup>166</sup> | 528.7545 | 1055.4945 | 1055.4958 | -1.20 |
|   | <sup>170</sup> VYSNFLR <sup>176</sup>   | 449.7427 | 897.4709  | 897.4708  | 0.031 |
|   | <sup>181</sup> LYTGEACR <sup>188</sup>  | 485.2262 | 968.4378  | 968.4386  | -0.73 |

Figure 5

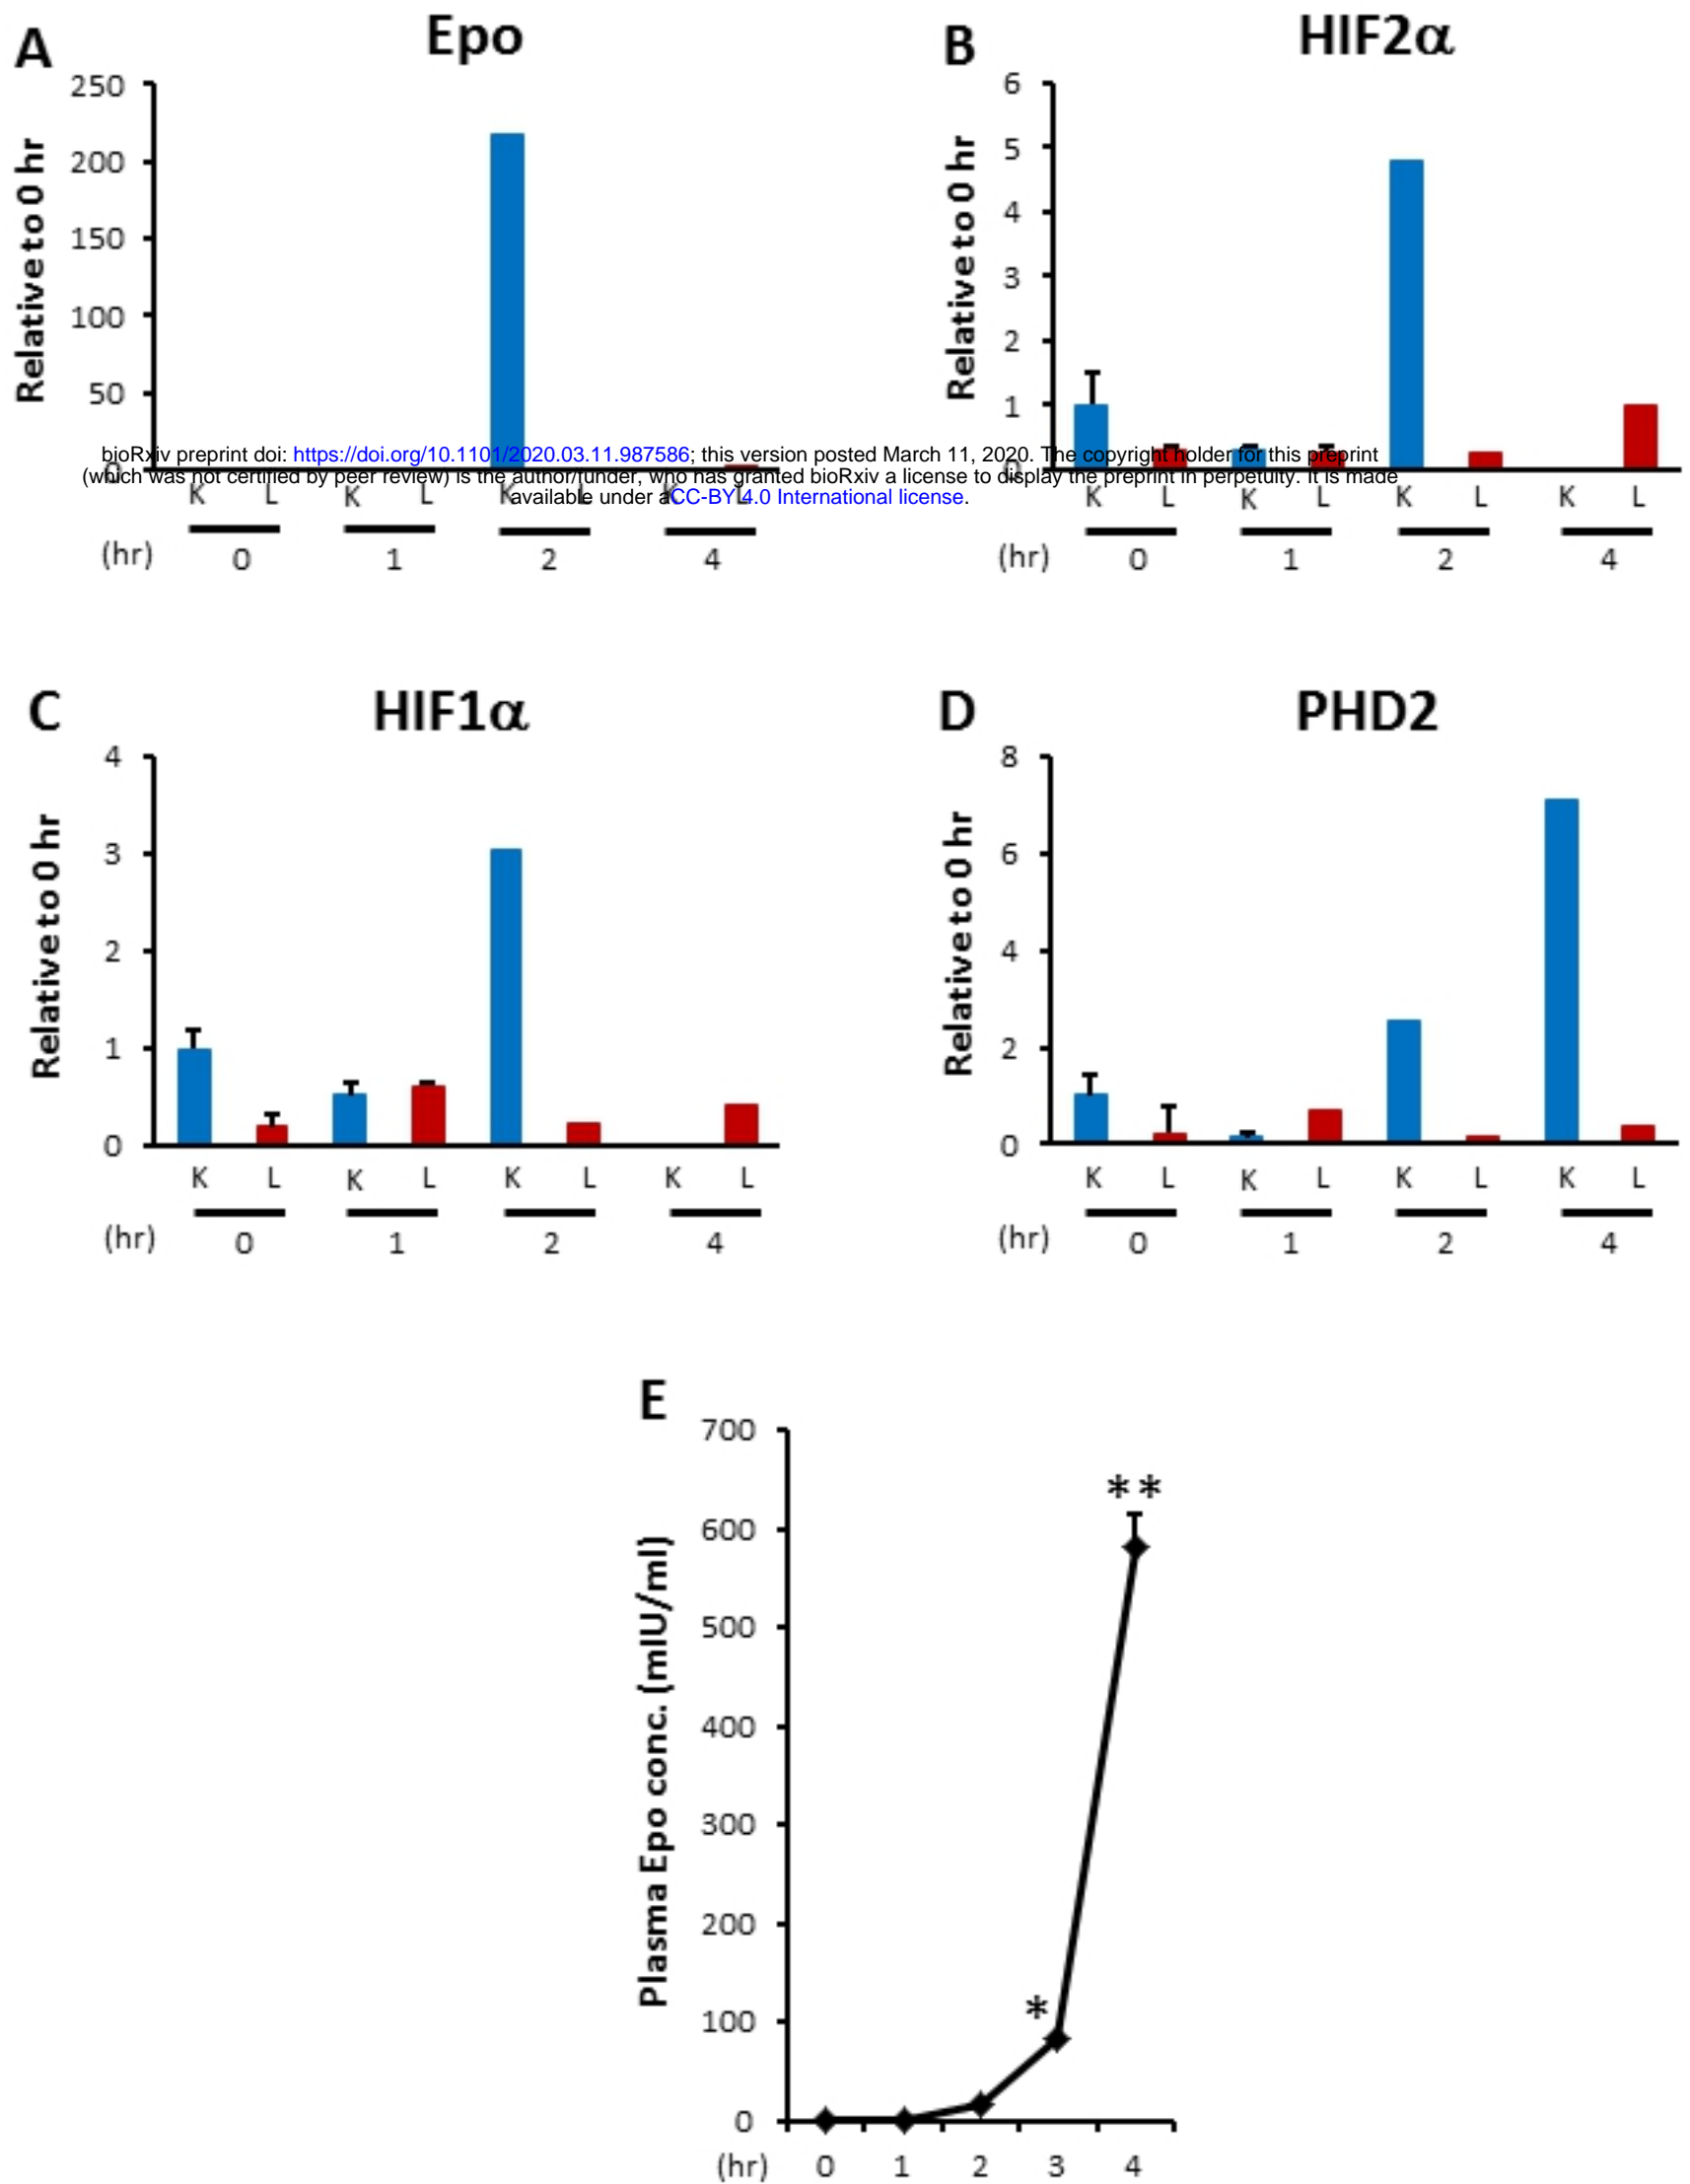

Figure
